# Supplementary material for: Using new geospatial data and 2020 fossil fuel methane emissions for the Global Fuel Exploitation Inventory (GFEI) v3
Source: Copernicus journal article supplement (doi:10.5194/essd-2024-552), 2025-02-11
Supplement: Supplementary file 1 [file essd-2024-552-supplement.pdf]

*Supplement of*

**Using new geospatial data and 2020 fossil fuel methane emissions for the  
Global Fuel Exploitation Inventory (GFEI) v3**

**Tia R. Scarpelli et al.**

*Correspondence to:* Tia R. Scarpelli (tia@carbonmapper.org)

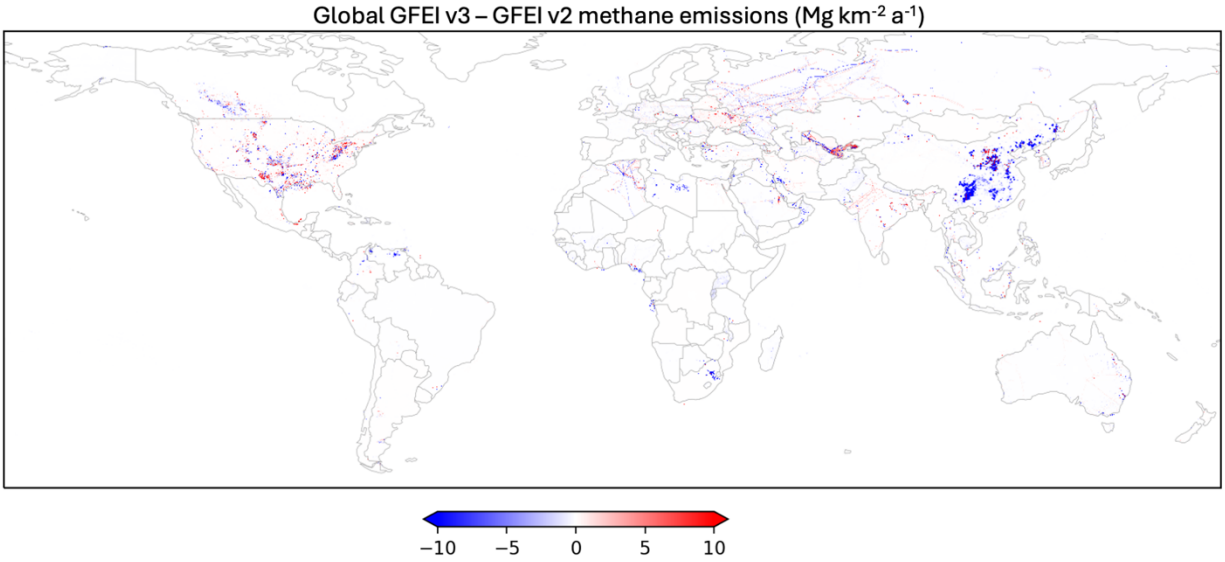

**Figure S1:** The difference between GFEI v3 and GFEI v2 oil, gas, and coal emissions. The emissions difference is shown at GFEI native resolution ( $0.1^\circ \times 0.1^\circ$ ). In the US, the spatial differences in emissions between the two GFEI versions are primarily a result of the GEPA update from v1 to v2, including oil-gas increases in the Permian (south-central US) and coal decreases in Appalachia (northeast US).

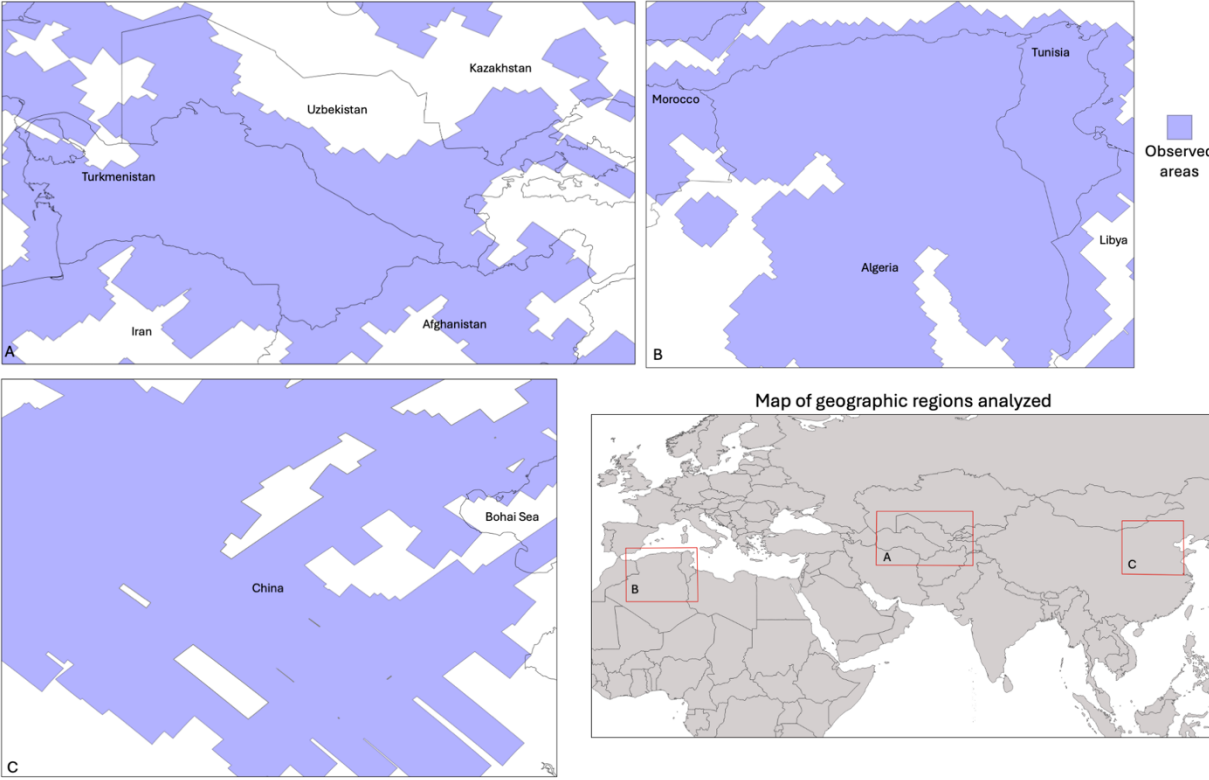

**Figure S2:** Map of the geographic regions where Carbon Mapper has processed data to look for super-emitting events in Turkmenistan/Uzbekistan (A; top left), Algeria (B; top right), and northeast China (C; bottom left). The bottom right plot shows a zoomed-out map view of the three regions.

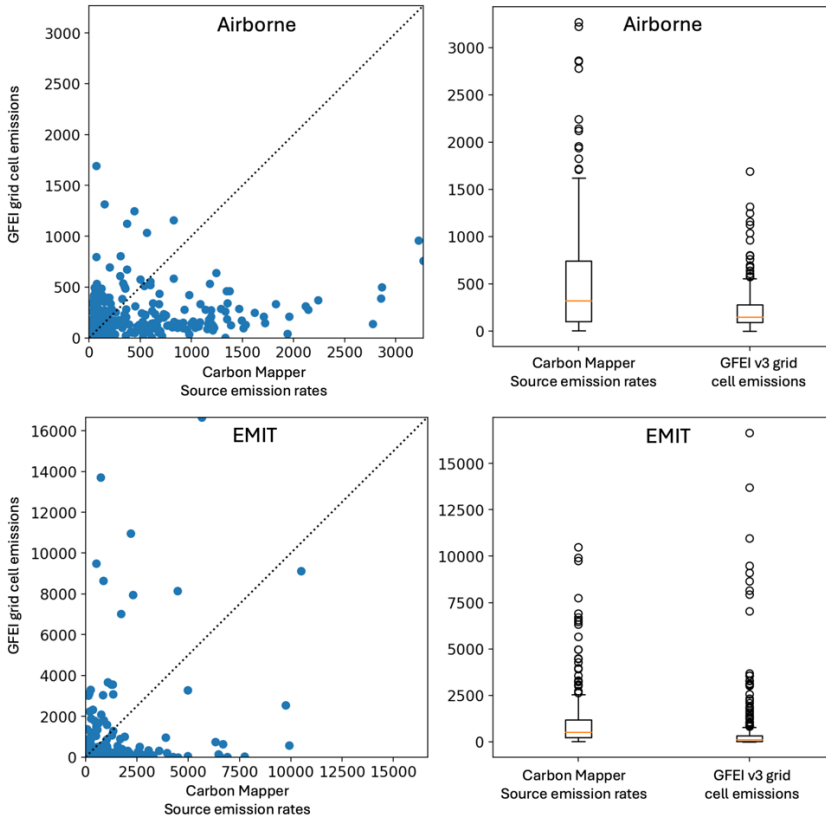

**Figure S3:** Carbon Mapper methane emission rates for oil-gas sources compared to GFEI v3 grid-cell oil-gas emissions (all emission rates are in  $\text{kg hr}^{-1}$ ). We show source emission rates estimated by Carbon Mapper using observations from airborne instruments (top) and observations from the EMIT instrument (bottom). The Carbon Mapper source emission rates are an average of plume emission rates for a particular source (sources are based on a clustering distance of 150 meters) and adjusted for persistence. We only include Carbon Mapper sources that have been observed at least 5 times (including observations where no plume was detected). We only include GFEI grid cells that overlap the Carbon Mapper sources and vice versa.

**Table S1:** Mine-level methane emissions used to spatially distribute the UNFCCC reported coal emissions within each country for GFEI v3. The coal mine location, country, and mine ID are from the Global Energy Monitor’s Global Coal Mine Tracker (GCMT), and the mine-level emissions are as described in Roy (2023) and summarized in Appendix A.

| GCMT Mine ID | Country     | Latitude | Longitude | Mine-level emission (Gg) |
|--------------|-------------|----------|-----------|--------------------------|
| M1761        | Afghanistan | 35.733   | 67.308    | 0.261                    |
| M1760        | Afghanistan | 35.332   | 68.120    | 0.652                    |
| M1526        | Afghanistan | 35.705   | 67.312    | 5.542                    |
| M0001        | Afghanistan | 35.863   | 67.597    | 19.428                   |
| M1527        | Albania     | 41.392   | 19.736    | 0.737                    |
| M1528        | Argentina   | -51.538  | -72.324   | 0.456                    |
| M0105        | Australia   | -30.640  | 150.167   | 0.024                    |
| M0012        | Australia   | -22.703  | 147.544   | 0.025                    |
| M0059        | Australia   | -26.938  | 150.774   | 0.030                    |
| M1532        | Australia   | -41.613  | 148.125   | 0.034                    |
| M0069        | Australia   | -22.848  | 148.632   | 0.043                    |

|       |           |         |         |       |
|-------|-----------|---------|---------|-------|
| M0089 | Australia | -33.392 | 116.287 | 0.046 |
| M0042 | Australia | -32.451 | 151.078 | 0.049 |
| M0067 | Australia | -26.814 | 151.912 | 0.054 |
| M0064 | Australia | -32.295 | 150.707 | 0.066 |
| M0019 | Australia | -24.311 | 150.622 | 0.117 |
| M0010 | Australia | -32.268 | 150.840 | 0.127 |
| M0120 | Australia | -38.195 | 146.360 | 0.195 |
| M0062 | Australia | -38.235 | 146.564 | 0.304 |
| M0002 | Australia | -33.113 | 150.015 | 0.619 |
| M0030 | Australia | -20.637 | 147.850 | 0.657 |
| M0026 | Australia | -33.460 | 150.248 | 0.847 |
| M1780 | Australia | -32.116 | 151.975 | 0.986 |
| M0102 | Australia | -33.401 | 150.106 | 1.106 |
| M0008 | Australia | -24.137 | 149.794 | 1.206 |
| M2419 | Australia | -21.824 | 147.979 | 1.216 |
| M0055 | Australia | -20.714 | 147.860 | 1.282 |
| M3690 | Australia | -23.590 | 149.079 | 1.327 |
| M2347 | Australia | -21.845 | 148.427 | 1.431 |
| M1337 | Australia | -21.972 | 148.372 | 1.503 |
| M0020 | Australia | -26.618 | 150.355 | 1.576 |
| M0072 | Australia | -32.283 | 149.759 | 1.588 |
| M0068 | Australia | -24.434 | 148.386 | 1.658 |
| M0121 | Australia | -23.318 | 149.026 | 1.707 |
| M0028 | Australia | -20.557 | 147.815 | 2.101 |
| M0033 | Australia | -24.617 | 150.050 | 2.322 |
| M0056 | Australia | -23.407 | 148.951 | 2.322 |
| M0029 | Australia | -27.934 | 151.255 | 2.364 |
| M0098 | Australia | -20.620 | 147.860 | 2.626 |
| M1531 | Australia | -23.716 | 148.889 | 2.629 |
| M0053 | Australia | -21.979 | 148.129 | 2.653 |
| M0013 | Australia | -32.793 | 151.584 | 2.787 |
| M0116 | Australia | -31.407 | 150.640 | 3.195 |
| M0032 | Australia | -22.041 | 148.270 | 3.206 |
| M0054 | Australia | -21.972 | 148.113 | 3.206 |
| M1529 | Australia | -41.560 | 148.131 | 3.296 |
| M0031 | Australia | -23.493 | 148.843 | 3.317 |
| M3697 | Australia | -32.576 | 151.007 | 3.881 |
| M0040 | Australia | -22.998 | 148.804 | 4.510 |
| M0088 | Australia | -22.067 | 148.255 | 4.643 |
| M0083 | Australia | -21.201 | 147.888 | 4.754 |

|       |           |         |         |        |
|-------|-----------|---------|---------|--------|
| M0080 | Australia | -33.060 | 151.569 | 4.909  |
| M1530 | Australia | -33.163 | 151.550 | 5.047  |
| M0113 | Australia | -32.576 | 151.007 | 5.313  |
| M0035 | Australia | -20.705 | 147.813 | 5.417  |
| M0044 | Australia | -23.149 | 148.388 | 5.842  |
| M2357 | Australia | -33.177 | 151.543 | 5.844  |
| M0099 | Australia | -21.753 | 148.443 | 5.970  |
| M0106 | Australia | -32.243 | 149.750 | 6.224  |
| M0018 | Australia | -21.243 | 147.835 | 6.566  |
| M0093 | Australia | -32.524 | 151.121 | 6.907  |
| M0024 | Australia | -22.106 | 148.048 | 8.623  |
| M1345 | Australia | -34.185 | 150.997 | 8.660  |
| M0072 | Australia | -32.283 | 149.759 | 8.945  |
| M0096 | Australia | -22.371 | 148.300 | 9.728  |
| M0049 | Australia | -32.466 | 150.973 | 9.734  |
| M0046 | Australia | -21.485 | 148.370 | 10.392 |
| M0061 | Australia | -32.408 | 151.032 | 10.677 |
| M0060 | Australia | -22.461 | 148.406 | 10.723 |
| M0107 | Australia | -32.549 | 150.985 | 10.763 |
| M0031 | Australia | -23.493 | 148.843 | 10.834 |
| M0087 | Australia | -22.255 | 148.180 | 10.834 |
| M0007 | Australia | -32.469 | 151.078 | 11.158 |
| M2900 | Australia | -22.029 | 148.260 | 11.288 |
| M0014 | Australia | -30.612 | 150.155 | 11.363 |
| M0027 | Australia | -22.720 | 147.620 | 12.161 |
| M0011 | Australia | -23.686 | 148.807 | 12.824 |
| M0094 | Australia | -24.457 | 148.405 | 13.819 |
| M0077 | Australia | -32.407 | 151.086 | 14.794 |
| M0063 | Australia | -33.119 | 151.462 | 15.758 |
| M0076 | Australia | -32.256 | 150.850 | 15.866 |
| M0038 | Australia | -23.454 | 148.497 | 16.943 |
| M0091 | Australia | -32.443 | 151.006 | 18.653 |
| M0065 | Australia | -30.563 | 150.115 | 18.996 |
| M0021 | Australia | -22.991 | 148.581 | 19.864 |
| M0043 | Australia | -21.792 | 147.962 | 20.783 |
| M0081 | Australia | -30.519 | 149.904 | 21.146 |
| M0050 | Australia | -32.525 | 150.982 | 21.161 |
| M0085 | Australia | -23.072 | 148.484 | 22.143 |
| M0022 | Australia | -21.950 | 148.209 | 22.576 |
| M0034 | Australia | -34.420 | 150.826 | 23.481 |

|       |                        |         |         |        |
|-------|------------------------|---------|---------|--------|
| M0117 | Australia              | -32.332 | 149.885 | 23.541 |
| M0078 | Australia              | -32.607 | 151.090 | 26.586 |
| M0045 | Australia              | -21.974 | 148.011 | 28.503 |
| M0006 | Australia              | -22.982 | 148.537 | 29.212 |
| M3693 | Australia              | -32.193 | 150.894 | 31.879 |
| M0074 | Australia              | -21.871 | 147.957 | 31.889 |
| M0075 | Australia              | -32.337 | 150.856 | 31.946 |
| M0058 | Australia              | -23.236 | 148.358 | 33.126 |
| M0103 | Australia              | -34.253 | 150.575 | 34.786 |
| M0005 | Australia              | -34.211 | 150.793 | 40.874 |
| M0016 | Australia              | -21.803 | 147.980 | 48.915 |
| M0052 | Australia              | -21.976 | 148.235 | 56.441 |
| M0017 | Australia              | -32.680 | 151.100 | 58.338 |
| M0023 | Australia              | -22.074 | 146.330 | 90.316 |
| M0122 | Bangladesh             | 25.547  | 88.961  | 11.725 |
| M1534 | Bhutan                 | 26.852  | 91.451  | 0.042  |
| M1535 | Bhutan                 | 26.903  | 91.680  | 0.056  |
| M1533 | Bhutan                 | 26.903  | 91.680  | 0.070  |
| M0125 | Bosnia and Herzegovina | 44.140  | 18.098  | 0.310  |
| M1540 | Bosnia and Herzegovina | 43.993  | 17.514  | 0.492  |
| M1536 | Bosnia and Herzegovina | 44.221  | 17.767  | 1.304  |
| M1538 | Bosnia and Herzegovina | 44.401  | 18.660  | 1.696  |
| M3699 | Bosnia and Herzegovina | 44.087  | 18.175  | 2.412  |
| M1759 | Bosnia and Herzegovina | 44.189  | 17.933  | 2.477  |
| M2518 | Bosnia and Herzegovina | 44.666  | 18.989  | 2.533  |
| M1539 | Bosnia and Herzegovina | 43.170  | 18.510  | 3.377  |
| M1758 | Bosnia and Herzegovina | 44.759  | 17.804  | 4.080  |
| M0126 | Bosnia and Herzegovina | 44.520  | 18.606  | 6.806  |
| M1756 | Bosnia and Herzegovina | 44.419  | 18.453  | 9.779  |
| M1537 | Bosnia and Herzegovina | 44.002  | 18.256  | 12.843 |
| M0129 | Botswana               | -22.515 | 27.024  | 1.970  |
| M0127 | Botswana               | -24.527 | 26.003  | 3.172  |
| M1374 | Botswana               | -22.515 | 27.024  | 10.888 |
| M1542 | Brazil                 | -30.390 | -53.046 | 0.141  |
| M1541 | Brazil                 | -30.090 | -51.719 | 1.266  |
| M0131 | Brazil                 | -30.102 | -51.938 | 1.438  |
| M0132 | Brazil                 | -31.449 | -53.708 | 3.940  |
| M3008 | Bulgaria               | 42.646  | 23.057  | 0.436  |
| M1762 | Bulgaria               | 42.378  | 22.997  | 0.732  |
| M3703 | Bulgaria               | 42.274  | 26.014  | 10.553 |

|       |          |        |          |        |
|-------|----------|--------|----------|--------|
| M3701 | Bulgaria | 42.168 | 26.038   | 12.944 |
| M3702 | Bulgaria | 42.170 | 26.039   | 21.668 |
| M0134 | Cambodia | 14.186 | 104.319  | 0.340  |
| M1764 | Canada   | 53.218 | -112.431 | 0.113  |
| M1763 | Canada   | 45.565 | -62.673  | 0.281  |
| M0159 | Canada   | 55.622 | -122.217 | 1.688  |
| M0160 | Canada   | 55.061 | -121.253 | 2.111  |
| M0137 | Canada   | 55.387 | -121.820 | 3.518  |
| M0138 | Canada   | 53.052 | -116.798 | 4.221  |
| M0154 | Canada   | 49.213 | -105.471 | 4.643  |
| M0150 | Canada   | 49.917 | -114.776 | 5.628  |
| M0141 | Canada   | 49.093 | -102.886 | 6.050  |
| M0146 | Canada   | 50.200 | -115.008 | 6.754  |
| M0143 | Canada   | 53.315 | -114.286 | 7.035  |
| M0158 | Canada   | 53.396 | -117.648 | 7.457  |
| M0140 | Canada   | 49.743 | -114.824 | 11.115 |
| M0142 | Canada   | 50.193 | -114.865 | 11.819 |
| M3705 | Canada   | 46.178 | -59.825  | 67.157 |
| M2922 | China    | 39.545 | 110.234  | 0.935  |
| M3043 | China    | 39.441 | 106.962  | 0.935  |
| M2921 | China    | 40.637 | 110.292  | 0.935  |
| M2923 | China    | 39.082 | 110.582  | 0.935  |
| M3812 | China    | 39.437 | 106.973  | 0.935  |
| M3814 | China    | 39.511 | 106.614  | 0.935  |
| M3815 | China    | 39.510 | 106.631  | 0.935  |
| M3156 | China    | 39.178 | 106.371  | 1.152  |
| M2372 | China    | 39.870 | 110.297  | 1.246  |
| M1824 | China    | 45.221 | 119.239  | 1.246  |
| M2368 | China    | 39.803 | 111.316  | 1.246  |
| M1872 | China    | 39.658 | 106.887  | 1.246  |
| M1871 | China    | 39.625 | 106.888  | 1.246  |
| M0221 | China    | 39.875 | 110.321  | 1.246  |
| M2316 | China    | 39.384 | 110.657  | 1.246  |
| M2373 | China    | 39.904 | 111.379  | 1.246  |
| M3103 | China    | 39.401 | 110.481  | 1.246  |
| M0270 | China    | 39.624 | 106.892  | 1.246  |
| M2367 | China    | 39.643 | 107.037  | 1.246  |
| M2377 | China    | 39.698 | 106.878  | 1.246  |
| M1804 | China    | 39.734 | 106.891  | 1.246  |
| M3773 | China    | 40.016 | 109.920  | 1.246  |

|       |       |        |         |       |
|-------|-------|--------|---------|-------|
| M2366 | China | 39.624 | 107.077 | 1.246 |
| M2364 | China | 39.577 | 110.536 | 1.246 |
| M1795 | China | 40.694 | 110.604 | 1.246 |
| M1385 | China | 39.661 | 110.355 | 1.246 |
| M2361 | China | 39.629 | 107.066 | 1.246 |
| M2369 | China | 39.803 | 110.237 | 1.246 |
| M1805 | China | 39.381 | 110.668 | 1.246 |
| M1242 | China | 39.433 | 110.736 | 1.246 |
| M2378 | China | 39.864 | 110.042 | 1.246 |
| M2362 | China | 39.377 | 110.610 | 1.246 |
| M2359 | China | 45.465 | 119.550 | 1.246 |
| M1822 | China | 45.250 | 119.269 | 1.558 |
| M1936 | China | 39.490 | 110.514 | 1.558 |
| M3738 | China | 39.444 | 106.928 | 1.558 |
| M1801 | China | 39.966 | 109.898 | 1.558 |
| M2433 | China | 45.534 | 119.611 | 1.869 |
| M1808 | China | 39.443 | 110.308 | 1.869 |
| M3107 | China | 39.401 | 110.419 | 1.869 |
| M2434 | China | 39.616 | 110.292 | 1.869 |
| M2365 | China | 39.617 | 110.553 | 1.869 |
| M2061 | China | 39.377 | 110.601 | 1.869 |
| M2098 | China | 39.544 | 110.515 | 1.869 |
| M1798 | China | 40.098 | 109.697 | 1.869 |
| M2147 | China | 39.713 | 110.201 | 1.869 |
| M3212 | China | 39.470 | 110.510 | 1.869 |
| M3033 | China | 37.484 | 113.683 | 2.074 |
| M3073 | China | 37.229 | 113.498 | 2.074 |
| M3807 | China | 39.064 | 112.578 | 2.074 |
| M2031 | China | 39.442 | 110.440 | 2.077 |
| M2363 | China | 39.570 | 110.610 | 2.077 |
| M1977 | China | 39.759 | 110.197 | 2.181 |
| M1338 | China | 42.248 | 82.496  | 2.428 |
| M2086 | China | 44.052 | 81.467  | 2.428 |
| M1799 | China | 39.545 | 110.515 | 2.492 |
| M2371 | China | 39.865 | 111.370 | 2.492 |
| M1418 | China | 39.714 | 110.244 | 2.492 |
| M2053 | China | 39.483 | 110.266 | 2.492 |
| M2095 | China | 39.586 | 110.332 | 2.492 |
| M2370 | China | 39.858 | 110.082 | 2.492 |
| M1962 | China | 39.004 | 112.632 | 2.766 |



|       |       |        |         |       |
|-------|-------|--------|---------|-------|
| M1921 | China | 52.944 | 122.340 | 2.902 |
| M2078 | China | 41.993 | 123.559 | 2.933 |
| M2073 | China | 44.043 | 81.468  | 3.035 |
| M1895 | China | 42.241 | 116.465 | 3.070 |
| M2374 | China | 45.466 | 119.538 | 3.070 |
| M1794 | China | 49.439 | 119.760 | 3.070 |
| M1874 | China | 39.883 | 110.334 | 3.116 |
| M1116 | China | 49.414 | 119.666 | 3.116 |
| M1141 | China | 45.537 | 119.609 | 3.116 |
| M1142 | China | 45.537 | 119.609 | 3.116 |
| M1155 | China | 39.869 | 111.338 | 3.116 |
| M2452 | China | 39.716 | 110.243 | 3.116 |
| M1905 | China | 39.033 | 110.647 | 3.174 |
| M2262 | China | 38.758 | 110.424 | 3.174 |
| M1836 | China | 39.083 | 112.338 | 3.457 |
| M3802 | China | 39.654 | 112.625 | 3.522 |
| M3183 | China | 40.119 | 113.120 | 3.522 |
| M2437 | China | 39.630 | 110.283 | 3.739 |
| M1417 | China | 39.721 | 111.341 | 3.739 |
| M2242 | China | 39.557 | 110.677 | 3.739 |
| M1847 | China | 38.817 | 110.394 | 3.809 |
| M0212 | China | 38.575 | 110.040 | 3.809 |
| M1903 | China | 39.234 | 110.609 | 3.809 |
| M1904 | China | 39.214 | 110.635 | 3.809 |
| M1955 | China | 35.631 | 109.068 | 3.809 |
| M1982 | China | 37.151 | 109.590 | 3.809 |
| M2081 | China | 39.248 | 110.713 | 3.809 |
| M2376 | China | 38.860 | 110.392 | 3.809 |
| M2305 | China | 38.987 | 110.703 | 3.809 |
| M2004 | China | 39.780 | 110.212 | 3.838 |
| M2144 | China | 39.997 | 109.906 | 3.838 |
| M0183 | China | 44.175 | 91.740  | 4.047 |
| M1105 | China | 39.459 | 110.487 | 4.154 |
| M1133 | China | 39.745 | 110.362 | 4.154 |
| M1143 | China | 45.537 | 119.609 | 4.154 |
| M2465 | China | 39.680 | 110.258 | 4.154 |
| M0402 | China | 36.791 | 113.255 | 4.452 |
| M2436 | China | 49.433 | 119.797 | 4.605 |
| M2016 | China | 42.373 | 119.348 | 4.605 |
| M2028 | China | 42.070 | 119.320 | 4.605 |

|       |       |        |         |       |
|-------|-------|--------|---------|-------|
| M2435 | China | 49.418 | 119.861 | 4.605 |
| M1948 | China | 37.384 | 113.676 | 4.610 |
| M2134 | China | 35.049 | 108.036 | 4.761 |
| M0175 | China | 44.787 | 118.456 | 5.193 |
| M1346 | China | 39.842 | 110.116 | 5.193 |
| M0211 | China | 48.768 | 119.941 | 5.193 |
| M0288 | China | 44.037 | 113.230 | 5.193 |
| M0294 | China | 39.834 | 110.142 | 5.193 |
| M1900 | China | 42.376 | 119.365 | 5.373 |
| M2054 | China | 39.164 | 111.194 | 5.532 |
| M0262 | China | 44.182 | 91.739  | 6.070 |
| M1171 | China | 43.137 | 92.663  | 6.070 |
| M1131 | China | 39.899 | 110.041 | 6.231 |
| M1139 | China | 39.480 | 111.230 | 6.231 |
| M0298 | China | 39.801 | 110.305 | 6.231 |
| M1186 | China | 39.858 | 110.083 | 6.231 |
| M2483 | China | 43.999 | 116.001 | 6.231 |
| M2019 | China | 37.680 | 120.342 | 6.272 |
| M3708 | China | 25.158 | 101.354 | 6.463 |
| M2914 | China | 35.577 | 116.038 | 6.555 |
| M2106 | China | 39.100 | 110.696 | 6.665 |
| M1863 | China | 49.238 | 120.555 | 6.908 |
| M1136 | China | 36.968 | 111.481 | 6.914 |
| M1161 | China | 39.408 | 111.325 | 6.914 |
| M1214 | China | 43.238 | 87.519  | 7.082 |
| M0175 | China | 44.787 | 118.456 | 7.270 |
| M2960 | China | 35.865 | 117.163 | 7.375 |
| M2959 | China | 35.393 | 116.445 | 7.375 |
| M2958 | China | 36.220 | 116.552 | 7.375 |
| M2035 | China | 34.909 | 116.823 | 7.377 |
| M2091 | China | 34.863 | 117.117 | 7.604 |
| M2189 | China | 35.195 | 116.582 | 7.604 |
| M1230 | China | 39.993 | 111.362 | 7.676 |
| M2208 | China | 23.818 | 103.196 | 7.880 |
| M2905 | China | 34.026 | 116.919 | 7.926 |
| M1888 | China | 35.634 | 116.673 | 7.984 |
| M0181 | China | 44.539 | 90.367  | 8.094 |
| M1196 | China | 42.825 | 87.914  | 8.094 |
| M1106 | China | 39.833 | 110.375 | 8.308 |
| M0428 | China | 49.148 | 120.227 | 8.308 |

|       |       |        |         |        |
|-------|-------|--------|---------|--------|
| M1827 | China | 35.074 | 116.896 | 8.364  |
| M2145 | China | 35.872 | 117.682 | 8.364  |
| M2155 | China | 35.631 | 116.526 | 8.364  |
| M2957 | China | 42.000 | 126.555 | 8.623  |
| M2258 | China | 35.470 | 116.802 | 8.745  |
| M2014 | China | 34.782 | 116.954 | 8.853  |
| M2930 | China | 35.180 | 107.032 | 8.894  |
| M1323 | China | 37.343 | 111.043 | 8.905  |
| M1812 | China | 35.348 | 116.535 | 9.125  |
| M1850 | China | 35.460 | 116.566 | 9.125  |
| M1997 | China | 35.580 | 116.838 | 9.125  |
| M2046 | China | 35.096 | 116.561 | 9.125  |
| M2112 | China | 34.824 | 116.357 | 9.125  |
| M2217 | China | 35.902 | 117.611 | 9.125  |
| M1211 | China | 49.461 | 117.770 | 9.211  |
| M2007 | China | 35.309 | 113.411 | 9.371  |
| M1221 | China | 36.711 | 104.915 | 9.394  |
| M2164 | China | 33.761 | 113.368 | 9.746  |
| M2955 | China | 43.870 | 85.991  | 9.787  |
| M3174 | China | 43.150 | 88.115  | 9.787  |
| M3198 | China | 46.553 | 86.204  | 9.787  |
| M2953 | China | 42.188 | 83.156  | 9.787  |
| M1951 | China | 34.718 | 113.092 | 9.840  |
| M2006 | China | 41.635 | 121.333 | 9.893  |
| M2024 | China | 41.588 | 123.357 | 9.893  |
| M1163 | China | 49.450 | 117.743 | 9.978  |
| M2353 | China | 44.044 | 88.642  | 10.041 |
| M0345 | China | 44.272 | 93.057  | 10.117 |
| M2913 | China | 36.542 | 114.238 | 10.238 |
| M3197 | China | 46.539 | 85.976  | 10.330 |
| M0336 | China | 44.067 | 116.223 | 10.385 |
| M0338 | China | 43.955 | 115.911 | 10.385 |
| M2266 | China | 44.161 | 125.860 | 10.638 |
| M1818 | China | 36.241 | 116.613 | 10.646 |
| M2304 | China | 35.270 | 113.329 | 10.777 |
| M1945 | China | 41.929 | 121.614 | 10.792 |
| M1996 | China | 36.447 | 102.874 | 10.967 |
| M2057 | China | 35.198 | 106.815 | 10.967 |
| M0334 | China | 35.002 | 107.828 | 10.967 |
| M2250 | China | 34.840 | 116.945 | 11.066 |

|       |       |        |         |        |
|-------|-------|--------|---------|--------|
| M2294 | China | 34.807 | 116.837 | 11.066 |
| M1198 | China | 39.785 | 112.833 | 11.131 |
| M1835 | China | 34.450 | 113.413 | 11.245 |
| M1866 | China | 34.725 | 111.545 | 11.245 |
| M1912 | China | 34.398 | 113.154 | 11.245 |
| M2060 | China | 34.871 | 112.251 | 11.245 |
| M2143 | China | 34.560 | 112.872 | 11.245 |
| M2192 | China | 34.380 | 113.625 | 11.245 |
| M2245 | China | 34.788 | 112.136 | 11.245 |
| M2249 | China | 34.134 | 116.389 | 11.245 |
| M2301 | China | 34.831 | 112.196 | 11.245 |
| M1986 | China | 33.487 | 116.646 | 11.405 |
| M2169 | China | 34.925 | 117.108 | 11.406 |
| M3099 | China | 37.232 | 114.418 | 11.517 |
| M3101 | China | 36.945 | 114.379 | 11.517 |
| M3102 | China | 36.860 | 114.271 | 11.517 |
| M1853 | China | 37.521 | 96.023  | 11.881 |
| M1807 | China | 43.009 | 87.519  | 12.050 |
| M1809 | China | 43.022 | 87.454  | 12.050 |
| M1832 | China | 43.717 | 86.863  | 12.050 |
| M1944 | China | 44.170 | 92.173  | 12.050 |
| M2138 | China | 44.160 | 84.373  | 12.050 |
| M0411 | China | 44.044 | 81.469  | 12.140 |
| M3100 | China | 36.951 | 114.352 | 12.157 |
| M1939 | China | 35.902 | 114.195 | 12.182 |
| M2280 | China | 33.532 | 116.462 | 12.219 |
| M0370 | China | 39.535 | 111.295 | 12.462 |
| M0415 | China | 42.337 | 119.313 | 12.462 |
| M1933 | China | 41.863 | 86.199  | 12.552 |
| M1151 | China | 40.110 | 113.162 | 12.615 |
| M1938 | China | 35.936 | 114.170 | 12.651 |
| M3721 | China | 39.332 | 110.381 | 12.699 |
| M2933 | China | 39.452 | 110.051 | 12.699 |
| M3813 | China | 39.500 | 106.622 | 12.699 |
| M3816 | China | 39.391 | 106.943 | 12.699 |
| M2934 | China | 39.851 | 111.328 | 12.699 |
| M1164 | China | 49.484 | 117.695 | 12.793 |
| M0304 | China | 45.654 | 119.144 | 12.793 |
| M1317 | China | 33.569 | 116.738 | 12.842 |
| M2293 | China | 35.942 | 117.663 | 12.927 |

|       |       |        |         |        |
|-------|-------|--------|---------|--------|
| M2267 | China | 39.694 | 110.222 | 12.984 |
| M1920 | China | 35.343 | 113.459 | 13.119 |
| M1958 | China | 41.545 | 123.305 | 13.490 |
| M1327 | China | 42.750 | 123.037 | 13.490 |
| M2218 | China | 41.359 | 123.185 | 13.490 |
| M2196 | China | 43.859 | 87.646  | 13.556 |
| M1839 | China | 35.205 | 106.633 | 13.709 |
| M1890 | China | 35.219 | 106.672 | 13.709 |
| M2219 | China | 35.191 | 107.005 | 13.709 |
| M2244 | China | 35.140 | 106.920 | 13.709 |
| M0205 | China | 42.327 | 93.353  | 13.817 |
| M0272 | China | 34.091 | 113.465 | 14.057 |
| M2074 | China | 34.035 | 112.842 | 14.057 |
| M2077 | China | 34.211 | 113.524 | 14.057 |
| M2080 | China | 34.730 | 111.875 | 14.057 |
| M0381 | China | 34.257 | 112.726 | 14.057 |
| M2306 | China | 35.985 | 114.154 | 14.057 |
| M2235 | China | 47.291 | 130.295 | 14.185 |
| M2251 | China | 35.770 | 116.320 | 14.447 |
| M2039 | China | 35.646 | 115.962 | 14.600 |
| M2082 | China | 33.430 | 117.094 | 14.663 |
| M2085 | China | 33.656 | 116.533 | 14.663 |
| M2200 | China | 33.552 | 116.196 | 14.663 |
| M2439 | China | 32.700 | 116.536 | 14.663 |
| M2253 | China | 33.644 | 116.749 | 14.663 |
| M2281 | China | 33.569 | 116.580 | 14.663 |
| M2223 | China | 37.092 | 114.542 | 14.738 |
| M3030 | China | 36.419 | 112.058 | 14.804 |
| M3032 | China | 37.638 | 113.661 | 14.804 |
| M3034 | China | 35.984 | 113.101 | 14.804 |
| M3037 | China | 35.933 | 113.000 | 14.804 |
| M3038 | China | 36.006 | 113.150 | 14.804 |
| M3709 | China | 36.727 | 113.090 | 14.804 |
| M3040 | China | 36.902 | 113.262 | 14.804 |
| M3042 | China | 35.892 | 113.121 | 14.804 |
| M3045 | China | 39.422 | 112.469 | 14.804 |
| M3046 | China | 35.818 | 113.111 | 14.804 |
| M3715 | China | 39.839 | 112.879 | 14.804 |
| M3716 | China | 40.129 | 113.070 | 14.804 |
| M3719 | China | 37.945 | 112.630 | 14.804 |

|       |       |        |         |        |
|-------|-------|--------|---------|--------|
| M3720 | China | 37.805 | 112.664 | 14.804 |
| M3048 | China | 37.754 | 113.578 | 14.804 |
| M3050 | China | 35.897 | 113.071 | 14.804 |
| M3051 | China | 37.959 | 113.070 | 14.804 |
| M3052 | China | 38.004 | 113.305 | 14.804 |
| M3054 | China | 36.873 | 112.195 | 14.804 |
| M3055 | China | 36.913 | 111.030 | 14.804 |
| M3056 | China | 37.068 | 111.660 | 14.804 |
| M3057 | China | 37.093 | 111.633 | 14.804 |
| M3060 | China | 35.713 | 112.984 | 14.804 |
| M3062 | China | 35.826 | 112.807 | 14.804 |
| M3063 | China | 35.860 | 113.122 | 14.804 |
| M3064 | China | 35.734 | 113.032 | 14.804 |
| M3065 | China | 35.574 | 111.996 | 14.804 |
| M3726 | China | 37.970 | 112.110 | 14.804 |
| M3066 | China | 37.922 | 112.156 | 14.804 |
| M3067 | China | 36.432 | 112.064 | 14.804 |
| M3068 | China | 37.688 | 113.674 | 14.804 |
| M3070 | China | 35.741 | 110.613 | 14.804 |
| M3071 | China | 38.042 | 113.290 | 14.804 |
| M3072 | China | 38.002 | 113.438 | 14.804 |
| M3074 | China | 36.298 | 111.365 | 14.804 |
| M3075 | China | 35.859 | 110.794 | 14.804 |
| M3076 | China | 36.931 | 111.567 | 14.804 |
| M3077 | China | 36.448 | 111.366 | 14.804 |
| M3080 | China | 36.133 | 111.025 | 14.804 |
| M3081 | China | 39.490 | 112.472 | 14.804 |
| M3085 | China | 38.931 | 112.483 | 14.804 |
| M3086 | China | 36.554 | 112.164 | 14.804 |
| M3089 | China | 39.742 | 112.598 | 14.804 |
| M3090 | China | 37.058 | 112.141 | 14.804 |
| M3091 | China | 37.010 | 112.145 | 14.804 |
| M3092 | China | 37.057 | 112.118 | 14.804 |
| M3093 | China | 37.033 | 112.074 | 14.804 |
| M3096 | China | 35.649 | 112.513 | 14.804 |
| M3097 | China | 39.802 | 112.855 | 14.804 |
| M2944 | China | 36.562 | 112.468 | 14.804 |
| M3108 | China | 36.539 | 112.152 | 14.804 |
| M3109 | China | 35.735 | 112.808 | 14.804 |
| M3110 | China | 35.718 | 112.806 | 14.804 |

|       |       |        |         |        |
|-------|-------|--------|---------|--------|
| M3111 | China | 35.688 | 112.922 | 14.804 |
| M3112 | China | 35.841 | 113.013 | 14.804 |
| M3114 | China | 36.472 | 112.151 | 14.804 |
| M3115 | China | 35.672 | 112.886 | 14.804 |
| M3116 | China | 39.694 | 112.617 | 14.804 |
| M3751 | China | 35.713 | 112.775 | 14.804 |
| M3118 | China | 38.234 | 111.719 | 14.804 |
| M3119 | China | 36.471 | 112.112 | 14.804 |
| M3120 | China | 36.500 | 111.316 | 14.804 |
| M3122 | China | 36.920 | 111.729 | 14.804 |
| M3757 | China | 37.378 | 110.952 | 14.804 |
| M3125 | China | 38.035 | 113.240 | 14.804 |
| M3126 | China | 37.971 | 113.148 | 14.804 |
| M3165 | China | 37.973 | 112.074 | 14.804 |
| M3127 | China | 39.449 | 112.379 | 14.804 |
| M3133 | China | 39.421 | 112.303 | 14.804 |
| M3134 | China | 39.446 | 112.377 | 14.804 |
| M3136 | China | 37.020 | 112.213 | 14.804 |
| M3137 | China | 35.666 | 112.640 | 14.804 |
| M3138 | China | 36.234 | 111.266 | 14.804 |
| M3139 | China | 36.501 | 111.276 | 14.804 |
| M3141 | China | 36.432 | 111.350 | 14.804 |
| M3142 | China | 35.841 | 112.988 | 14.804 |
| M3143 | China | 36.552 | 112.149 | 14.804 |
| M3144 | China | 36.991 | 112.192 | 14.804 |
| M3145 | China | 36.598 | 112.277 | 14.804 |
| M3146 | China | 36.945 | 111.883 | 14.804 |
| M3147 | China | 37.034 | 113.353 | 14.804 |
| M3792 | China | 38.144 | 111.765 | 14.804 |
| M3149 | China | 38.011 | 113.304 | 14.804 |
| M3150 | China | 35.681 | 112.256 | 14.804 |
| M3151 | China | 39.735 | 112.755 | 14.804 |
| M3152 | China | 39.166 | 111.209 | 14.804 |
| M3153 | China | 38.812 | 111.124 | 14.804 |
| M3154 | China | 39.018 | 112.279 | 14.804 |
| M2951 | China | 39.004 | 112.491 | 14.804 |
| M3796 | China | 38.770 | 112.351 | 14.804 |
| M3158 | China | 37.874 | 113.479 | 14.804 |
| M3159 | China | 38.102 | 113.467 | 14.804 |
| M2947 | China | 37.163 | 113.425 | 14.804 |

|       |       |        |         |        |
|-------|-------|--------|---------|--------|
| M3160 | China | 37.908 | 112.847 | 14.804 |
| M3162 | China | 39.813 | 112.649 | 14.804 |
| M3164 | China | 35.933 | 113.035 | 14.804 |
| M3804 | China | 37.632 | 112.195 | 14.804 |
| M3169 | China | 35.661 | 112.928 | 14.804 |
| M3170 | China | 35.578 | 112.805 | 14.804 |
| M3171 | China | 36.948 | 111.802 | 14.804 |
| M3172 | China | 35.816 | 110.621 | 14.804 |
| M3173 | China | 35.541 | 112.658 | 14.804 |
| M3176 | China | 38.842 | 112.367 | 14.804 |
| M3177 | China | 39.700 | 112.566 | 14.804 |
| M3178 | China | 39.027 | 112.454 | 14.804 |
| M3179 | China | 39.111 | 112.417 | 14.804 |
| M3180 | China | 39.003 | 112.552 | 14.804 |
| M3185 | China | 36.682 | 113.061 | 14.804 |
| M3822 | China | 36.555 | 113.035 | 14.804 |
| M3188 | China | 36.650 | 113.006 | 14.804 |
| M3190 | China | 39.085 | 112.305 | 14.804 |
| M3191 | China | 39.057 | 111.188 | 14.804 |
| M3192 | China | 35.946 | 113.016 | 14.804 |
| M3193 | China | 36.272 | 111.330 | 14.804 |
| M3195 | China | 37.590 | 113.663 | 14.804 |
| M3196 | China | 35.893 | 113.108 | 14.804 |
| M3201 | China | 35.505 | 112.584 | 14.804 |
| M3202 | China | 35.532 | 112.293 | 14.804 |
| M3203 | China | 38.009 | 113.413 | 14.804 |
| M3204 | China | 35.615 | 112.301 | 14.804 |
| M3205 | China | 35.558 | 112.534 | 14.804 |
| M3206 | China | 35.535 | 112.486 | 14.804 |
| M3207 | China | 35.537 | 112.445 | 14.804 |
| M3208 | China | 35.961 | 113.075 | 14.804 |
| M3209 | China | 35.899 | 113.047 | 14.804 |
| M3211 | China | 35.697 | 111.951 | 14.804 |
| M3214 | China | 36.934 | 111.617 | 14.804 |
| M3215 | China | 36.992 | 111.809 | 14.804 |
| M3216 | China | 37.003 | 112.121 | 14.804 |
| M3217 | China | 36.988 | 111.860 | 14.804 |
| M3218 | China | 37.044 | 112.101 | 14.804 |
| M3166 | China | 37.792 | 112.078 | 14.804 |
| M3219 | China | 37.866 | 112.754 | 14.804 |



|       |       |        |         |        |
|-------|-------|--------|---------|--------|
| M3220 | China | 37.808 | 112.703 | 14.804 |
| M2945 | China | 40.128 | 113.071 | 14.804 |
| M3222 | China | 37.412 | 113.635 | 14.804 |
| M3223 | China | 37.247 | 113.484 | 14.804 |
| M3225 | China | 37.203 | 113.446 | 14.804 |
| M3226 | China | 37.096 | 113.361 | 14.804 |
| M3840 | China | 39.809 | 112.846 | 14.804 |
| M2943 | China | 39.018 | 110.566 | 14.810 |
| M2928 | China | 39.062 | 110.284 | 14.810 |
| M3058 | China | 39.083 | 110.676 | 14.810 |
| M2942 | China | 39.249 | 110.567 | 14.810 |
| M2940 | China | 35.908 | 109.082 | 14.810 |
| M2939 | China | 34.819 | 107.967 | 14.810 |
| M1216 | China | 38.873 | 111.117 | 14.841 |
| M1877 | China | 46.493 | 131.523 | 14.894 |
| M2428 | China | 43.022 | 87.455  | 15.062 |
| M3088 | China | 43.808 | 86.352  | 15.062 |
| M2027 | China | 43.706 | 87.201  | 15.062 |
| M1831 | China | 37.426 | 113.653 | 15.111 |
| M1833 | China | 37.999 | 113.208 | 15.111 |
| M1978 | China | 37.472 | 111.198 | 15.111 |
| M2247 | China | 36.029 | 113.003 | 15.111 |
| M2354 | China | 39.225 | 110.343 | 15.117 |
| M2287 | China | 35.360 | 108.950 | 15.117 |
| M0174 | China | 44.810 | 118.500 | 15.578 |
| M0237 | China | 45.928 | 119.107 | 15.578 |
| M2399 | China | 39.393 | 107.065 | 15.581 |
| M2406 | China | 39.669 | 110.307 | 15.581 |
| M1802 | China | 39.403 | 106.953 | 15.581 |
| M1875 | China | 39.465 | 106.918 | 15.581 |
| M2403 | China | 39.411 | 110.280 | 15.581 |
| M2317 | China | 39.616 | 110.293 | 15.581 |
| M0235 | China | 39.724 | 106.893 | 15.581 |
| M2404 | China | 39.350 | 110.586 | 15.581 |
| M1968 | China | 39.379 | 110.148 | 15.581 |
| M2401 | China | 39.465 | 107.142 | 15.581 |
| M1331 | China | 38.327 | 106.577 | 15.581 |
| M2065 | China | 39.490 | 110.153 | 15.581 |
| M2391 | China | 39.557 | 110.219 | 15.581 |
| M2389 | China | 39.371 | 107.103 | 15.581 |

|       |       |        |         |        |
|-------|-------|--------|---------|--------|
| M1188 | China | 39.323 | 107.097 | 15.581 |
| M2090 | China | 39.391 | 107.027 | 15.581 |
| M2392 | China | 39.729 | 110.245 | 15.581 |
| M2386 | China | 39.313 | 110.600 | 15.581 |
| M2136 | China | 39.651 | 110.319 | 15.581 |
| M2387 | China | 39.355 | 106.957 | 15.581 |
| M2379 | China | 39.747 | 106.878 | 15.581 |
| M2381 | China | 39.719 | 106.880 | 15.581 |
| M2236 | China | 39.380 | 110.393 | 15.581 |
| M1786 | China | 49.500 | 121.423 | 15.581 |
| M2407 | China | 39.681 | 110.275 | 15.581 |
| M2388 | China | 39.367 | 110.373 | 15.581 |
| M2402 | China | 39.405 | 106.986 | 15.581 |
| M2166 | China | 33.756 | 113.303 | 15.931 |
| M1947 | China | 33.925 | 116.672 | 16.293 |
| M1929 | China | 36.349 | 102.879 | 16.451 |
| M2261 | China | 36.433 | 102.880 | 16.451 |
| M2093 | China | 40.110 | 112.942 | 16.622 |
| M0278 | China | 49.393 | 117.767 | 16.631 |
| M1817 | China | 34.354 | 113.085 | 16.868 |
| M1834 | China | 34.055 | 112.895 | 16.868 |
| M1865 | China | 34.716 | 111.906 | 16.868 |
| M1867 | China | 34.831 | 112.108 | 16.868 |
| M2071 | China | 34.499 | 113.458 | 16.868 |
| M2117 | China | 33.924 | 116.622 | 16.868 |
| M2296 | China | 35.416 | 113.698 | 16.868 |
| M1881 | China | 45.363 | 131.238 | 17.022 |
| M0299 | China | 47.311 | 130.358 | 17.022 |
| M2075 | China | 45.147 | 130.768 | 17.022 |
| M2240 | China | 45.751 | 131.115 | 17.022 |
| M2209 | China | 42.473 | 123.593 | 17.537 |
| M2176 | China | 33.613 | 116.657 | 17.634 |
| M1319 | China | 33.633 | 116.634 | 17.663 |
| M1857 | China | 36.537 | 114.221 | 17.685 |
| M1858 | China | 36.561 | 114.279 | 17.685 |
| M2010 | China | 36.341 | 114.124 | 17.685 |
| M2025 | China | 39.719 | 118.446 | 17.685 |
| M2252 | China | 36.478 | 114.247 | 17.685 |
| M2037 | China | 44.005 | 125.647 | 17.731 |
| M2168 | China | 33.784 | 113.224 | 17.805 |

|       |       |        |         |        |
|-------|-------|--------|---------|--------|
| M2160 | China | 41.908 | 86.188  | 18.074 |
| M2233 | China | 43.781 | 86.526  | 18.074 |
| M1811 | China | 36.745 | 112.234 | 18.133 |
| M1814 | China | 36.447 | 112.106 | 18.133 |
| M1821 | China | 37.877 | 113.354 | 18.133 |
| M0185 | China | 39.809 | 112.845 | 18.133 |
| M1320 | China | 36.839 | 112.286 | 18.133 |
| M3039 | China | 36.955 | 112.160 | 18.133 |
| M3041 | China | 35.993 | 113.070 | 18.133 |
| M1842 | China | 35.759 | 110.605 | 18.133 |
| M1860 | China | 35.875 | 113.020 | 18.133 |
| M3717 | China | 39.951 | 112.965 | 18.133 |
| M2415 | China | 38.009 | 113.362 | 18.133 |
| M2414 | China | 37.836 | 113.551 | 18.133 |
| M1868 | China | 38.581 | 112.129 | 18.133 |
| M1869 | China | 37.617 | 110.897 | 18.133 |
| M1870 | China | 37.574 | 110.847 | 18.133 |
| M1879 | China | 35.766 | 112.773 | 18.133 |
| M2417 | China | 38.072 | 113.429 | 18.133 |
| M1892 | China | 36.819 | 113.195 | 18.133 |
| M1893 | China | 35.680 | 112.529 | 18.133 |
| M1344 | China | 37.025 | 112.191 | 18.133 |
| M1898 | China | 37.775 | 111.139 | 18.133 |
| M1899 | China | 37.528 | 113.674 | 18.133 |
| M0214 | China | 38.573 | 112.140 | 18.133 |
| M1902 | China | 36.953 | 113.296 | 18.133 |
| M1908 | China | 37.454 | 111.143 | 18.133 |
| M3723 | China | 36.117 | 111.051 | 18.133 |
| M1910 | China | 37.160 | 113.401 | 18.133 |
| M2395 | China | 40.169 | 113.130 | 18.133 |
| M1785 | China | 37.308 | 110.983 | 18.133 |
| M3061 | China | 35.905 | 112.955 | 18.133 |
| M1915 | China | 35.959 | 113.035 | 18.133 |
| M0223 | China | 36.505 | 111.387 | 18.133 |
| M1917 | China | 38.491 | 111.149 | 18.133 |
| M1922 | China | 35.544 | 112.263 | 18.133 |
| M3727 | China | 37.924 | 112.234 | 18.133 |
| M1925 | China | 39.465 | 112.439 | 18.133 |
| M1932 | China | 36.410 | 111.351 | 18.133 |
| M1934 | China | 35.801 | 110.683 | 18.133 |

|       |       |        |         |        |
|-------|-------|--------|---------|--------|
| M1941 | China | 36.250 | 111.241 | 18.133 |
| M1956 | China | 35.664 | 112.749 | 18.133 |
| M2382 | China | 35.918 | 113.047 | 18.133 |
| M1960 | China | 35.574 | 112.539 | 18.133 |
| M1963 | China | 37.728 | 111.114 | 18.133 |
| M1964 | China | 35.535 | 112.581 | 18.133 |
| M3735 | China | 36.814 | 112.201 | 18.133 |
| M1967 | China | 37.652 | 110.887 | 18.133 |
| M3087 | China | 36.870 | 111.698 | 18.133 |
| M1972 | China | 36.444 | 111.520 | 18.133 |
| M1976 | China | 36.451 | 111.413 | 18.133 |
| M1981 | China | 39.741 | 112.600 | 18.133 |
| M1987 | China | 37.616 | 111.087 | 18.133 |
| M1990 | China | 38.292 | 112.024 | 18.133 |
| M1991 | China | 35.657 | 112.887 | 18.133 |
| M1993 | China | 36.562 | 112.979 | 18.133 |
| M1994 | China | 37.983 | 113.230 | 18.133 |
| M3095 | China | 36.973 | 112.135 | 18.133 |
| M2012 | China | 37.701 | 111.110 | 18.133 |
| M3113 | China | 35.797 | 113.041 | 18.133 |
| M3117 | China | 35.889 | 112.870 | 18.133 |
| M1788 | China | 39.044 | 112.343 | 18.133 |
| M2018 | China | 36.928 | 111.780 | 18.133 |
| M2020 | China | 37.636 | 112.289 | 18.133 |
| M1429 | China | 37.627 | 110.887 | 18.133 |
| M2022 | China | 36.871 | 111.773 | 18.133 |
| M3755 | China | 37.740 | 111.016 | 18.133 |
| M2026 | China | 37.530 | 111.098 | 18.133 |
| M2030 | China | 37.549 | 110.848 | 18.133 |
| M0279 | China | 36.593 | 112.209 | 18.133 |
| M2032 | China | 37.404 | 113.619 | 18.133 |
| M1796 | China | 35.747 | 113.019 | 18.133 |
| M3124 | China | 36.889 | 112.198 | 18.133 |
| M1790 | China | 37.726 | 112.274 | 18.133 |
| M1792 | China | 36.770 | 112.248 | 18.133 |
| M2059 | China | 38.967 | 112.237 | 18.133 |
| M3129 | China | 39.030 | 112.396 | 18.133 |
| M2068 | China | 35.743 | 112.909 | 18.133 |
| M2394 | China | 39.832 | 112.822 | 18.133 |
| M3140 | China | 36.444 | 111.349 | 18.133 |

|       |       |        |         |        |
|-------|-------|--------|---------|--------|
| M2079 | China | 35.776 | 112.797 | 18.133 |
| M2084 | China | 40.112 | 113.162 | 18.133 |
| M2088 | China | 36.579 | 112.182 | 18.133 |
| M2089 | China | 36.569 | 112.219 | 18.133 |
| M2097 | China | 37.583 | 111.110 | 18.133 |
| M1793 | China | 36.951 | 111.852 | 18.133 |
| M2100 | China | 37.797 | 111.143 | 18.133 |
| M0325 | China | 35.566 | 111.950 | 18.133 |
| M2118 | China | 35.871 | 112.909 | 18.133 |
| M2123 | China | 36.083 | 110.967 | 18.133 |
| M2124 | China | 36.664 | 113.008 | 18.133 |
| M2127 | China | 36.525 | 112.878 | 18.133 |
| M2132 | China | 35.771 | 111.831 | 18.133 |
| M3161 | China | 35.939 | 112.972 | 18.133 |
| M2146 | China | 38.842 | 111.153 | 18.133 |
| M2151 | China | 37.716 | 110.964 | 18.133 |
| M2156 | China | 37.490 | 111.132 | 18.133 |
| M2161 | China | 35.781 | 110.616 | 18.133 |
| M2170 | China | 37.237 | 113.475 | 18.133 |
| M2171 | China | 36.296 | 111.320 | 18.133 |
| M2173 | China | 36.938 | 111.759 | 18.133 |
| M2174 | China | 37.425 | 110.904 | 18.133 |
| M2182 | China | 37.046 | 111.795 | 18.133 |
| M2184 | China | 36.746 | 113.104 | 18.133 |
| M2191 | China | 38.995 | 111.125 | 18.133 |
| M2194 | China | 36.224 | 111.210 | 18.133 |
| M1797 | China | 36.791 | 113.164 | 18.133 |
| M2201 | China | 35.645 | 112.301 | 18.133 |
| M3821 | China | 36.670 | 113.033 | 18.133 |
| M3186 | China | 36.128 | 111.078 | 18.133 |
| M1427 | China | 36.049 | 113.094 | 18.133 |
| M2212 | China | 35.635 | 112.216 | 18.133 |
| M2214 | China | 37.611 | 110.875 | 18.133 |
| M2383 | China | 36.494 | 111.708 | 18.133 |
| M2246 | China | 36.029 | 113.003 | 18.133 |
| M1787 | China | 39.699 | 112.697 | 18.133 |
| M1942 | China | 36.277 | 111.286 | 18.133 |
| M2276 | China | 35.570 | 112.511 | 18.133 |
| M2277 | China | 39.593 | 112.449 | 18.133 |
| M2282 | China | 37.840 | 112.756 | 18.133 |

|       |       |        |         |        |
|-------|-------|--------|---------|--------|
| M2416 | China | 38.024 | 113.465 | 18.133 |
| M0416 | China | 35.635 | 112.733 | 18.133 |
| M2285 | China | 35.885 | 110.825 | 18.133 |
| M2295 | China | 37.430 | 111.187 | 18.133 |
| M2297 | China | 37.651 | 112.230 | 18.133 |
| M2299 | China | 36.013 | 112.930 | 18.133 |
| M0431 | China | 36.974 | 111.600 | 18.133 |
| M2949 | China | 37.011 | 111.611 | 18.133 |
| M2309 | China | 35.792 | 112.945 | 18.133 |
| M2310 | China | 37.424 | 111.141 | 18.133 |
| M2312 | China | 35.609 | 112.270 | 18.133 |
| M1430 | China | 37.862 | 112.828 | 18.133 |
| M1816 | China | 38.406 | 109.867 | 18.141 |
| M1400 | China | 38.420 | 109.806 | 18.141 |
| M1878 | China | 35.214 | 109.953 | 18.141 |
| M1883 | China | 35.174 | 109.904 | 18.141 |
| M1924 | China | 39.283 | 110.385 | 18.141 |
| M1906 | China | 39.191 | 110.625 | 18.141 |
| M1935 | China | 38.438 | 109.942 | 18.141 |
| M1940 | China | 39.023 | 110.348 | 18.141 |
| M1324 | China | 38.481 | 110.021 | 18.141 |
| M1311 | China | 35.195 | 110.134 | 18.141 |
| M1328 | China | 39.205 | 110.003 | 18.141 |
| M0323 | China | 39.237 | 110.664 | 18.141 |
| M2119 | China | 39.066 | 110.245 | 18.141 |
| M1399 | China | 38.519 | 110.024 | 18.141 |
| M2129 | China | 39.093 | 110.482 | 18.141 |
| M0346 | China | 38.450 | 109.955 | 18.141 |
| M2573 | China | 38.785 | 110.245 | 18.141 |
| M2227 | China | 39.181 | 110.524 | 18.141 |
| M0407 | China | 35.209 | 108.801 | 18.141 |
| M1829 | China | 34.958 | 117.026 | 18.249 |
| M1926 | China | 35.519 | 115.952 | 18.249 |
| M0236 | China | 39.140 | 111.197 | 18.438 |
| M2036 | China | 45.863 | 131.244 | 18.440 |
| M2272 | China | 47.333 | 130.316 | 18.440 |
| M0257 | China | 45.496 | 119.594 | 18.693 |
| M0425 | China | 45.379 | 119.423 | 18.693 |
| M1852 | China | 42.374 | 123.614 | 18.886 |
| M2210 | China | 42.374 | 123.614 | 18.886 |

|       |       |        |         |        |
|-------|-------|--------|---------|--------|
| M1222 | China | 38.027 | 109.286 | 19.044 |
| M2113 | China | 35.306 | 106.616 | 19.193 |
| M2917 | China | 26.608 | 105.155 | 19.249 |
| M0194 | China | 38.299 | 106.534 | 19.477 |
| M1876 | China | 39.375 | 110.320 | 19.477 |
| M1957 | China | 39.345 | 110.598 | 19.477 |
| M2429 | China | 49.064 | 120.862 | 19.477 |
| M2390 | China | 39.438 | 110.367 | 19.477 |
| M2423 | China | 39.391 | 106.849 | 19.477 |
| M1316 | China | 39.427 | 106.944 | 19.477 |
| M2320 | China | 39.935 | 110.020 | 19.477 |
| M2154 | China | 39.836 | 111.294 | 19.477 |
| M2226 | China | 39.794 | 111.255 | 19.477 |
| M2321 | China | 39.273 | 110.655 | 19.477 |
| M2094 | China | 33.472 | 116.769 | 19.551 |
| M2313 | China | 33.616 | 117.122 | 19.551 |
| M2315 | China | 33.459 | 116.871 | 19.551 |
| M2001 | China | 35.438 | 112.790 | 19.644 |
| M2050 | China | 39.182 | 111.257 | 19.644 |
| M2225 | China | 37.561 | 110.877 | 19.644 |
| M2445 | China | 27.893 | 104.873 | 19.652 |
| M2092 | China | 34.075 | 113.635 | 19.679 |
| M2165 | China | 33.881 | 113.380 | 19.679 |
| M2238 | China | 33.858 | 116.280 | 19.679 |
| M2008 | China | 36.430 | 114.262 | 19.807 |
| M2237 | China | 45.776 | 131.142 | 19.859 |
| M1859 | China | 36.727 | 104.853 | 20.107 |
| M1950 | China | 36.674 | 105.033 | 20.107 |
| M1134 | China | 26.504 | 105.211 | 20.381 |
| M3747 | China | 27.370 | 106.635 | 20.381 |
| M3758 | China | 26.151 | 105.278 | 20.381 |
| M4333 | China | 25.973 | 104.764 | 20.381 |
| M4334 | China | 26.561 | 105.012 | 20.381 |
| M2961 | China | 26.781 | 105.765 | 20.381 |
| M0373 | China | 44.655 | 116.703 | 20.468 |
| M1901 | China | 34.855 | 117.051 | 20.531 |
| M1304 | China | 35.376 | 116.872 | 20.531 |
| M2158 | China | 33.532 | 117.031 | 20.573 |
| M0332 | China | 24.221 | 103.410 | 20.737 |
| M0176 | China | 44.898 | 118.616 | 20.770 |

|       |       |        |         |        |
|-------|-------|--------|---------|--------|
| M1980 | China | 34.933 | 117.051 | 20.911 |
| M2167 | China | 33.778 | 113.266 | 20.991 |
| M2064 | China | 36.721 | 111.830 | 21.156 |
| M1923 | China | 36.814 | 114.204 | 21.222 |
| M2109 | China | 39.908 | 114.508 | 21.222 |
| M2290 | China | 36.733 | 114.163 | 21.222 |
| M1820 | China | 42.775 | 130.317 | 21.277 |
| M1985 | China | 45.267 | 131.113 | 21.277 |
| M1959 | China | 41.497 | 123.230 | 21.584 |
| M2017 | China | 41.845 | 123.941 | 21.584 |
| M1321 | China | 42.404 | 123.593 | 21.584 |
| M2459 | China | 35.140 | 106.920 | 21.935 |
| M1952 | China | 39.016 | 102.587 | 21.935 |
| M0359 | China | 37.089 | 106.785 | 21.935 |
| M2466 | China | 32.698 | 116.591 | 21.995 |
| M2047 | China | 43.136 | 92.712  | 22.091 |
| M0398 | China | 38.605 | 110.064 | 22.298 |
| M2211 | China | 42.423 | 123.645 | 22.483 |
| M2131 | China | 33.819 | 113.417 | 22.491 |
| M2163 | China | 33.813 | 113.173 | 22.491 |
| M1813 | China | 37.590 | 110.906 | 22.667 |
| M2430 | China | 37.507 | 113.624 | 22.667 |
| M1800 | China | 35.920 | 113.050 | 22.667 |
| M1855 | China | 39.411 | 112.315 | 22.667 |
| M1861 | China | 39.935 | 112.915 | 22.667 |
| M2946 | China | 39.821 | 112.610 | 22.667 |
| M1891 | China | 37.615 | 112.254 | 22.667 |
| M1919 | China | 36.479 | 111.352 | 22.667 |
| M1928 | China | 37.981 | 113.552 | 22.667 |
| M3069 | China | 39.759 | 112.647 | 22.667 |
| M1946 | China | 36.417 | 111.393 | 22.667 |
| M1953 | China | 35.945 | 113.068 | 22.667 |
| M3078 | China | 39.843 | 112.959 | 22.667 |
| M3079 | China | 39.772 | 112.858 | 22.667 |
| M2426 | China | 38.867 | 112.393 | 22.667 |
| M2002 | China | 37.696 | 110.973 | 22.667 |
| M3098 | China | 36.200 | 111.303 | 22.667 |
| M3121 | China | 36.201 | 111.329 | 22.667 |
| M3756 | China | 37.570 | 111.163 | 22.667 |
| M1789 | China | 37.476 | 110.890 | 22.667 |



|       |       |        |         |        |
|-------|-------|--------|---------|--------|
| M2042 | China | 39.454 | 112.449 | 22.667 |
| M2049 | China | 36.930 | 113.285 | 22.667 |
| M2052 | China | 38.014 | 113.235 | 22.667 |
| M2056 | China | 37.462 | 110.889 | 22.667 |
| M2431 | China | 35.805 | 112.823 | 22.667 |
| M2069 | China | 37.175 | 111.073 | 22.667 |
| M2076 | China | 37.637 | 113.643 | 22.667 |
| M2083 | China | 37.997 | 113.415 | 22.667 |
| M3155 | China | 39.494 | 112.510 | 22.667 |
| M2181 | China | 36.032 | 110.919 | 22.667 |
| M2427 | China | 40.174 | 113.022 | 22.667 |
| M2159 | China | 39.994 | 113.047 | 22.667 |
| M2172 | China | 36.288 | 111.306 | 22.667 |
| M3175 | China | 39.727 | 112.743 | 22.667 |
| M2187 | China | 37.502 | 111.160 | 22.667 |
| M2198 | China | 37.071 | 112.207 | 22.667 |
| M2203 | China | 39.594 | 112.386 | 22.667 |
| M2203 | China | 39.594 | 112.387 | 22.667 |
| M2221 | China | 37.355 | 113.576 | 22.667 |
| M2425 | China | 36.588 | 112.980 | 22.667 |
| M2228 | China | 39.472 | 112.476 | 22.667 |
| M2234 | China | 37.365 | 111.187 | 22.667 |
| M3826 | China | 35.712 | 111.944 | 22.667 |
| M2283 | China | 35.600 | 112.579 | 22.667 |
| M1806 | China | 36.441 | 112.098 | 22.667 |
| M2286 | China | 36.445 | 112.111 | 22.667 |
| M2302 | China | 38.208 | 111.775 | 22.667 |
| M1428 | China | 37.062 | 111.625 | 22.667 |
| M2307 | China | 37.624 | 112.136 | 22.667 |
| M2308 | China | 39.022 | 112.370 | 22.667 |
| M1854 | China | 35.830 | 109.019 | 22.676 |
| M1931 | China | 39.117 | 111.095 | 22.676 |
| M1943 | China | 38.740 | 110.063 | 22.676 |
| M2066 | China | 39.226 | 110.488 | 22.676 |
| M2099 | China | 39.253 | 110.500 | 22.676 |
| M2120 | China | 39.274 | 110.382 | 22.676 |
| M2121 | China | 39.220 | 110.051 | 22.676 |
| M2180 | China | 38.744 | 110.024 | 22.676 |
| M2122 | China | 39.029 | 110.314 | 22.676 |
| M2140 | China | 39.036 | 110.271 | 22.676 |

|       |       |        |         |        |
|-------|-------|--------|---------|--------|
| M2179 | China | 39.225 | 110.394 | 22.676 |
| M2216 | China | 35.609 | 110.561 | 22.676 |
| M2243 | China | 45.790 | 130.892 | 22.696 |
| M2356 | China | 38.257 | 106.510 | 22.728 |
| M1882 | China | 23.871 | 106.578 | 22.731 |
| M1123 | China | 34.854 | 117.028 | 22.812 |
| M1862 | China | 26.779 | 104.612 | 22.822 |
| M1911 | China | 25.164 | 104.503 | 23.012 |
| M0193 | China | 38.322 | 106.530 | 23.372 |
| M1880 | China | 39.409 | 110.583 | 23.372 |
| M2441 | China | 39.535 | 106.650 | 23.372 |
| M2067 | China | 39.859 | 110.023 | 23.372 |
| M2400 | China | 39.441 | 106.921 | 23.372 |
| M3213 | China | 39.655 | 111.282 | 23.372 |
| M2270 | China | 39.454 | 110.371 | 23.372 |
| M2438 | China | 39.689 | 110.208 | 23.372 |
| M2207 | China | 42.661 | 123.387 | 23.382 |
| M2284 | China | 25.923 | 104.500 | 23.860 |
| M1819 | China | 42.830 | 130.288 | 23.936 |
| M2222 | China | 46.616 | 131.689 | 24.114 |
| M2314 | China | 33.969 | 116.865 | 24.193 |
| M0164 | China | 32.900 | 116.229 | 24.439 |
| M0392 | China | 33.503 | 116.086 | 24.439 |
| M2162 | China | 33.760 | 113.349 | 24.740 |
| M1325 | China | 33.434 | 117.012 | 24.792 |
| M0350 | China | 37.492 | 106.798 | 24.795 |
| M1826 | China | 26.559 | 105.170 | 24.897 |
| M4330 | China | 27.100 | 105.571 | 24.897 |
| M4331 | China | 27.373 | 106.150 | 24.897 |
| M2552 | China | 27.395 | 106.178 | 24.897 |
| M0290 | China | 25.530 | 104.692 | 24.897 |
| M2408 | China | 25.423 | 104.864 | 24.897 |
| M4332 | China | 25.702 | 104.627 | 24.897 |
| M2412 | China | 27.106 | 106.097 | 24.897 |
| M2087 | China | 27.001 | 106.151 | 24.897 |
| M3799 | China | 26.265 | 104.686 | 24.897 |
| M2380 | China | 26.705 | 104.798 | 24.897 |
| M2409 | China | 26.484 | 105.619 | 24.897 |
| M2101 | China | 35.683 | 110.551 | 24.943 |
| M1160 | China | 35.576 | 116.198 | 25.093 |

|       |       |        |         |        |
|-------|-------|--------|---------|--------|
| M1252 | China | 35.387 | 115.952 | 25.093 |
| M2009 | China | 46.766 | 131.265 | 25.533 |
| M2096 | China | 45.189 | 131.178 | 25.533 |
| M0369 | China | 39.900 | 109.917 | 25.586 |
| M1918 | China | 27.846 | 105.904 | 25.621 |
| M1984 | China | 29.267 | 103.817 | 25.621 |
| M2048 | China | 30.415 | 106.866 | 25.621 |
| M2111 | China | 28.468 | 104.669 | 25.621 |
| M2126 | China | 28.076 | 106.019 | 25.621 |
| M2149 | China | 26.594 | 101.562 | 25.621 |
| M2450 | China | 39.496 | 106.659 | 25.969 |
| M1255 | China | 32.912 | 116.712 | 26.068 |
| M1837 | China | 33.927 | 116.496 | 26.239 |
| M0206 | China | 42.381 | 92.967  | 26.304 |
| M0206 | China | 42.381 | 92.967  | 26.304 |
| M1999 | China | 37.344 | 110.933 | 26.444 |
| M2229 | China | 37.392 | 110.940 | 26.444 |
| M2292 | China | 37.363 | 111.020 | 26.444 |
| M0180 | China | 46.272 | 132.574 | 26.606 |
| M1232 | China | 34.995 | 116.921 | 26.614 |
| M2448 | China | 45.340 | 131.015 | 26.951 |
| M2232 | China | 45.821 | 130.885 | 26.951 |
| M2178 | China | 43.671 | 87.156  | 27.112 |
| M1856 | China | 36.508 | 112.908 | 27.200 |
| M1864 | China | 35.675 | 112.760 | 27.200 |
| M1889 | China | 39.774 | 112.581 | 27.200 |
| M1894 | China | 37.084 | 111.572 | 27.200 |
| M2422 | China | 35.965 | 112.943 | 27.200 |
| M3059 | China | 35.765 | 113.020 | 27.200 |
| M1927 | China | 39.523 | 112.473 | 27.200 |
| M1937 | China | 36.389 | 111.353 | 27.200 |
| M1312 | China | 36.856 | 112.201 | 27.200 |
| M3731 | China | 37.297 | 113.528 | 27.200 |
| M1969 | China | 39.374 | 111.328 | 27.200 |
| M1971 | China | 37.721 | 113.622 | 27.200 |
| M1974 | China | 36.482 | 111.670 | 27.200 |
| M1988 | China | 38.756 | 111.121 | 27.200 |
| M1992 | China | 36.957 | 111.615 | 27.200 |
| M3123 | China | 37.751 | 111.034 | 27.200 |
| M2033 | China | 36.633 | 111.743 | 27.200 |

|       |       |        |         |        |
|-------|-------|--------|---------|--------|
| M2040 | China | 36.322 | 112.929 | 27.200 |
| M2041 | China | 36.516 | 112.935 | 27.200 |
| M2044 | China | 38.689 | 112.073 | 27.200 |
| M2055 | China | 39.474 | 112.440 | 27.200 |
| M0289 | China | 39.843 | 112.871 | 27.200 |
| M2062 | China | 39.066 | 112.350 | 27.200 |
| M2063 | China | 39.015 | 112.384 | 27.200 |
| M2104 | China | 36.856 | 112.200 | 27.200 |
| M1329 | China | 37.662 | 112.201 | 27.200 |
| M2115 | China | 37.671 | 110.931 | 27.200 |
| M2116 | China | 35.871 | 113.079 | 27.200 |
| M1322 | China | 35.770 | 113.080 | 27.200 |
| M0349 | China | 40.095 | 112.969 | 27.200 |
| M2141 | China | 36.151 | 111.133 | 27.200 |
| M2148 | China | 38.858 | 111.138 | 27.200 |
| M2153 | China | 35.725 | 112.776 | 27.200 |
| M2157 | China | 39.929 | 113.048 | 27.200 |
| M2190 | China | 39.767 | 112.921 | 27.200 |
| M2239 | China | 36.898 | 112.197 | 27.200 |
| M2263 | China | 35.978 | 112.909 | 27.200 |
| M2269 | China | 39.545 | 112.353 | 27.200 |
| M2271 | China | 37.018 | 111.824 | 27.200 |
| M2273 | China | 37.009 | 111.664 | 27.200 |
| M2274 | China | 37.321 | 113.531 | 27.200 |
| M2289 | China | 39.755 | 112.588 | 27.200 |
| M1302 | China | 37.114 | 113.387 | 27.200 |
| M1840 | China | 35.156 | 108.776 | 27.211 |
| M0234 | China | 39.169 | 110.356 | 27.211 |
| M2256 | China | 35.092 | 108.186 | 27.211 |
| M2298 | China | 35.065 | 108.620 | 27.211 |
| M2455 | China | 39.335 | 106.922 | 27.267 |
| M1241 | China | 34.882 | 116.913 | 27.357 |
| M2215 | China | 35.228 | 108.856 | 27.967 |
| M1250 | China | 35.411 | 113.628 | 28.113 |
| M1251 | China | 34.406 | 113.623 | 28.113 |
| M1234 | China | 43.913 | 94.667  | 28.328 |
| M1909 | China | 47.271 | 130.283 | 28.370 |
| M2133 | China | 46.520 | 131.738 | 28.370 |
| M2224 | China | 45.325 | 131.110 | 28.370 |
| M1989 | China | 43.113 | 123.368 | 28.566 |

|       |       |        |         |        |
|-------|-------|--------|---------|--------|
| M2300 | China | 37.943 | 112.064 | 28.711 |
| M1846 | China | 26.566 | 101.611 | 28.824 |
| M0337 | China | 44.003 | 116.007 | 29.078 |
| M1844 | China | 35.264 | 108.863 | 29.479 |
| M2043 | China | 33.539 | 117.182 | 29.500 |
| M1153 | China | 35.359 | 116.657 | 29.655 |
| M1206 | China | 35.438 | 116.520 | 29.655 |
| M1886 | China | 46.913 | 131.436 | 29.788 |
| M1887 | China | 45.203 | 130.937 | 29.788 |
| M1208 | China | 33.762 | 113.303 | 29.987 |
| M1209 | China | 33.788 | 113.241 | 29.987 |
| M1192 | China | 43.136 | 92.711  | 30.124 |
| M1137 | China | 35.222 | 106.671 | 30.160 |
| M2183 | China | 36.890 | 104.832 | 30.160 |
| M2275 | China | 40.013 | 113.103 | 30.222 |
| M2570 | China | 37.399 | 106.564 | 30.993 |
| M4328 | China | 27.423 | 106.152 | 31.121 |
| M2424 | China | 26.705 | 104.798 | 31.121 |
| M2202 | China | 26.597 | 105.288 | 31.121 |
| M1823 | China | 39.369 | 110.480 | 31.163 |
| M1841 | China | 39.489 | 111.361 | 31.163 |
| M1110 | China | 39.475 | 110.068 | 31.163 |
| M2457 | China | 39.451 | 110.281 | 31.163 |
| M1791 | China | 39.861 | 110.000 | 31.163 |
| M1916 | China | 39.854 | 111.264 | 31.163 |
| M1949 | China | 39.707 | 110.195 | 31.163 |
| M2319 | China | 39.610 | 111.165 | 31.163 |
| M2199 | China | 39.247 | 110.102 | 31.163 |
| M2322 | China | 39.273 | 110.655 | 31.163 |
| M2255 | China | 39.445 | 110.641 | 31.163 |
| M2260 | China | 39.928 | 111.344 | 31.163 |
| M2265 | China | 39.742 | 110.200 | 31.163 |
| M1187 | China | 33.507 | 116.924 | 31.363 |
| M1828 | China | 35.843 | 112.842 | 31.733 |
| M1897 | China | 37.652 | 111.113 | 31.733 |
| M1914 | China | 37.273 | 111.075 | 31.733 |
| M1966 | China | 36.060 | 112.971 | 31.733 |
| M1315 | China | 36.388 | 111.417 | 31.733 |
| M2108 | China | 38.011 | 113.327 | 31.733 |
| M2152 | China | 36.515 | 112.184 | 31.733 |

|       |       |        |         |        |
|-------|-------|--------|---------|--------|
| M2188 | China | 36.934 | 111.658 | 31.733 |
| M2195 | China | 39.491 | 112.294 | 31.733 |
| M2206 | China | 36.214 | 113.017 | 31.733 |
| M2248 | China | 37.591 | 110.809 | 31.733 |
| M2454 | China | 39.705 | 112.587 | 31.733 |
| M2038 | China | 30.557 | 106.930 | 32.026 |
| M1197 | China | 43.230 | 87.621  | 32.374 |
| M1254 | China | 32.863 | 116.823 | 32.585 |
| M1815 | China | 39.116 | 106.137 | 33.060 |
| M0173 | China | 44.948 | 118.667 | 33.261 |
| M2045 | China | 27.058 | 105.448 | 33.611 |
| M2566 | China | 46.145 | 129.385 | 34.044 |
| M1185 | China | 32.815 | 116.892 | 34.151 |
| M2303 | China | 26.712 | 105.271 | 34.233 |
| M2318 | China | 39.330 | 106.936 | 35.058 |
| M0341 | China | 39.794 | 111.255 | 35.309 |
| M1207 | China | 39.621 | 118.196 | 35.370 |
| M1219 | China | 36.591 | 114.127 | 35.370 |
| M1227 | China | 36.345 | 114.222 | 35.370 |
| M1843 | China | 39.286 | 111.306 | 36.267 |
| M1913 | China | 39.775 | 112.671 | 36.267 |
| M2000 | China | 36.509 | 112.969 | 36.267 |
| M2011 | China | 37.506 | 110.874 | 36.267 |
| M2023 | China | 35.940 | 112.923 | 36.267 |
| M2029 | China | 38.889 | 112.424 | 36.267 |
| M2150 | China | 38.961 | 111.164 | 36.267 |
| M2461 | China | 36.081 | 112.884 | 36.267 |
| M2268 | China | 37.946 | 113.556 | 36.267 |
| M0422 | China | 35.708 | 112.625 | 36.267 |
| M1830 | China | 35.111 | 108.504 | 36.281 |
| M1930 | China | 39.056 | 110.353 | 36.281 |
| M1970 | China | 39.054 | 110.187 | 36.281 |
| M2015 | China | 39.059 | 110.297 | 36.281 |
| M1172 | China | 35.867 | 108.834 | 36.281 |
| M2051 | China | 38.447 | 109.958 | 36.281 |
| M2130 | China | 39.141 | 110.417 | 36.281 |
| M2204 | China | 35.483 | 110.419 | 36.281 |
| M2288 | China | 35.314 | 108.920 | 36.281 |
| M1326 | China | 34.769 | 107.628 | 36.281 |
| M0230 | China | 39.731 | 111.258 | 36.348 |

|       |       |        |         |        |
|-------|-------|--------|---------|--------|
| M0339 | China | 49.392 | 119.746 | 36.348 |
| M1243 | China | 48.589 | 119.757 | 36.348 |
| M1401 | China | 39.346 | 110.596 | 36.357 |
| M0170 | China | 43.917 | 94.670  | 36.421 |
| M1212 | China | 42.652 | 123.327 | 36.423 |
| M1247 | China | 38.061 | 94.797  | 36.558 |
| M2464 | China | 46.870 | 131.466 | 36.881 |
| M0286 | China | 39.841 | 112.655 | 37.102 |
| M1332 | China | 37.819 | 106.334 | 37.192 |
| M1896 | China | 26.320 | 104.751 | 37.346 |
| M2931 | China | 27.170 | 105.953 | 37.346 |
| M1975 | China | 25.662 | 104.413 | 37.346 |
| M1124 | China | 34.737 | 111.764 | 37.484 |
| M2058 | China | 40.083 | 113.128 | 37.778 |
| M1210 | China | 33.758 | 113.426 | 37.953 |
| M0343 | China | 39.412 | 110.132 | 38.088 |
| M1965 | China | 26.594 | 101.572 | 38.431 |
| M1174 | China | 39.665 | 118.386 | 38.908 |
| M1983 | China | 39.845 | 110.049 | 38.953 |
| M1162 | China | 39.384 | 110.106 | 38.953 |
| M1167 | China | 39.493 | 110.090 | 38.953 |
| M1180 | China | 39.946 | 109.936 | 38.953 |
| M1188 | China | 39.323 | 107.097 | 38.953 |
| M1190 | China | 39.483 | 110.148 | 38.953 |
| M1204 | China | 39.914 | 111.321 | 38.953 |
| M1873 | China | 37.698 | 111.116 | 39.289 |
| M2103 | China | 36.176 | 113.045 | 39.289 |
| M2175 | China | 38.580 | 113.286 | 39.289 |
| M0376 | China | 44.934 | 89.185  | 40.468 |
| M0271 | China | 32.833 | 116.163 | 40.731 |
| M1884 | China | 39.421 | 112.404 | 40.800 |
| M2125 | China | 39.044 | 112.344 | 40.800 |
| M1333 | China | 37.912 | 113.102 | 40.800 |
| M1107 | China | 34.011 | 116.381 | 42.170 |
| M1130 | China | 37.349 | 110.974 | 42.311 |
| M1233 | China | 47.235 | 130.225 | 42.555 |
| M2456 | China | 26.484 | 105.619 | 43.570 |
| M2410 | China | 26.636 | 105.475 | 43.570 |
| M2418 | China | 26.668 | 105.750 | 43.570 |
| M1239 | China | 35.221 | 106.673 | 43.870 |

|       |       |        |         |        |
|-------|-------|--------|---------|--------|
| M1102 | China | 39.687 | 112.635 | 45.333 |
| M1108 | China | 39.951 | 113.087 | 45.333 |
| M1109 | China | 37.448 | 112.008 | 45.333 |
| M2453 | China | 37.724 | 110.990 | 45.333 |
| M1119 | China | 37.951 | 112.963 | 45.333 |
| M1907 | China | 36.461 | 111.330 | 45.333 |
| M1135 | China | 35.786 | 110.705 | 45.333 |
| M1138 | China | 39.712 | 112.734 | 45.333 |
| M1973 | China | 39.911 | 112.996 | 45.333 |
| M1150 | China | 36.059 | 113.048 | 45.333 |
| M1152 | China | 35.802 | 110.581 | 45.333 |
| M2003 | China | 35.660 | 112.017 | 45.333 |
| M1333 | China | 36.850 | 111.583 | 45.333 |
| M1157 | China | 37.962 | 113.030 | 45.333 |
| M2021 | China | 39.792 | 112.777 | 45.333 |
| M1168 | China | 37.074 | 111.537 | 45.333 |
| M2034 | China | 39.018 | 112.437 | 45.333 |
| M1170 | China | 36.089 | 112.863 | 45.333 |
| M1173 | China | 39.818 | 112.962 | 45.333 |
| M1182 | China | 39.754 | 112.731 | 45.333 |
| M2105 | China | 39.534 | 112.331 | 45.333 |
| M1193 | China | 37.704 | 112.287 | 45.333 |
| M2114 | China | 39.745 | 112.772 | 45.333 |
| M1195 | China | 37.412 | 110.862 | 45.333 |
| M1199 | China | 37.539 | 110.844 | 45.333 |
| M1202 | China | 39.764 | 112.794 | 45.333 |
| M2135 | China | 39.755 | 112.616 | 45.333 |
| M1203 | China | 36.102 | 113.050 | 45.333 |
| M1205 | China | 39.696 | 112.666 | 45.333 |
| M1217 | China | 35.673 | 112.729 | 45.333 |
| M2193 | China | 35.945 | 113.091 | 45.333 |
| M1225 | China | 39.717 | 112.697 | 45.333 |
| M2254 | China | 39.265 | 111.304 | 45.333 |
| M2257 | China | 37.989 | 113.440 | 45.333 |
| M1330 | China | 39.065 | 112.353 | 45.333 |
| M2291 | China | 39.796 | 112.581 | 45.333 |
| M1126 | China | 36.984 | 109.555 | 45.352 |
| M1129 | China | 39.406 | 110.188 | 45.352 |
| M1145 | China | 35.068 | 108.063 | 45.352 |
| M1181 | China | 39.082 | 110.582 | 45.352 |



|       |       |        |         |        |
|-------|-------|--------|---------|--------|
| M1229 | China | 35.069 | 108.044 | 45.352 |
| M1245 | China | 38.468 | 109.748 | 45.352 |
| M2311 | China | 38.011 | 109.461 | 45.352 |
| M0179 | China | 35.427 | 116.837 | 45.624 |
| M0266 | China | 35.274 | 116.667 | 45.624 |
| M0390 | China | 35.491 | 116.854 | 45.624 |
| M0394 | China | 35.278 | 115.883 | 45.624 |
| M1117 | China | 37.243 | 114.461 | 45.982 |
| M0165 | China | 39.449 | 112.361 | 46.096 |
| M0166 | China | 39.475 | 112.312 | 46.096 |
| M0306 | China | 39.551 | 112.442 | 46.096 |
| M1178 | China | 39.466 | 110.229 | 46.744 |
| M0256 | China | 39.259 | 110.224 | 47.610 |
| M2139 | China | 39.982 | 113.032 | 48.356 |
| M1144 | China | 39.443 | 110.035 | 49.341 |
| M1248 | China | 38.258 | 106.673 | 49.341 |
| M0239 | China | 38.392 | 106.542 | 49.589 |
| M0249 | China | 38.481 | 106.614 | 49.589 |
| M2142 | China | 26.040 | 104.627 | 49.794 |
| M2460 | China | 25.474 | 104.595 | 49.794 |
| M0321 | China | 46.553 | 86.206  | 50.207 |
| M0322 | China | 46.553 | 86.206  | 50.207 |
| M0259 | China | 44.651 | 90.120  | 50.585 |
| M0241 | China | 39.459 | 110.559 | 50.639 |
| M1998 | China | 25.707 | 104.490 | 50.832 |
| M1101 | China | 38.743 | 109.400 | 51.938 |
| M1183 | China | 38.323 | 106.697 | 51.938 |
| M1226 | China | 39.279 | 110.184 | 51.938 |
| M1238 | China | 33.401 | 116.710 | 52.923 |
| M1115 | China | 39.647 | 118.002 | 53.056 |
| M0188 | China | 23.801 | 103.181 | 53.915 |
| M1111 | China | 39.460 | 112.478 | 54.400 |
| M1118 | China | 37.909 | 112.192 | 54.400 |
| M1176 | China | 37.858 | 112.040 | 54.400 |
| M1228 | China | 36.493 | 113.048 | 54.400 |
| M1231 | China | 37.865 | 112.411 | 54.400 |
| M1121 | China | 39.646 | 118.433 | 56.593 |
| M1156 | China | 47.189 | 130.240 | 56.740 |
| M0209 | China | 35.441 | 116.899 | 57.030 |
| M2137 | China | 35.533 | 112.651 | 57.618 |

|       |       |        |         |        |
|-------|-------|--------|---------|--------|
| M2177 | China | 26.056 | 104.503 | 58.093 |
| M1120 | China | 37.828 | 112.377 | 58.178 |
| M1110 | China | 39.488 | 110.057 | 58.430 |
| M1220 | China | 39.495 | 109.973 | 58.430 |
| M1125 | China | 37.817 | 112.407 | 58.933 |
| M1099 | China | 39.264 | 110.785 | 58.957 |
| M0420 | China | 25.102 | 104.616 | 60.031 |
| M1112 | China | 42.383 | 93.021  | 60.248 |
| M0377 | China | 43.929 | 87.745  | 60.248 |
| M0182 | China | 39.107 | 112.341 | 60.444 |
| M1114 | China | 35.571 | 112.407 | 60.444 |
| M1140 | China | 36.103 | 112.924 | 60.444 |
| M1169 | China | 38.172 | 111.773 | 60.444 |
| M1194 | China | 39.200 | 111.196 | 60.444 |
| M1201 | China | 37.091 | 111.605 | 60.444 |
| M1215 | China | 37.900 | 112.109 | 60.444 |
| M2213 | China | 39.814 | 112.900 | 60.444 |
| M1237 | China | 37.920 | 112.158 | 60.444 |
| M1249 | China | 36.431 | 113.048 | 60.444 |
| M1122 | China | 39.123 | 110.545 | 60.469 |
| M1147 | China | 35.563 | 109.023 | 60.469 |
| M1166 | China | 34.863 | 107.844 | 60.469 |
| M1223 | China | 35.121 | 108.109 | 60.469 |
| M0401 | China | 35.217 | 107.970 | 60.469 |
| M1240 | China | 39.050 | 110.530 | 60.469 |
| M0246 | China | 44.502 | 90.297  | 60.702 |
| M1218 | China | 36.153 | 106.602 | 61.987 |
| M1244 | China | 36.240 | 106.616 | 61.987 |
| M0248 | China | 39.453 | 111.290 | 64.922 |
| M0261 | China | 39.343 | 106.995 | 64.922 |
| M2569 | China | 39.515 | 111.198 | 64.922 |
| M0297 | China | 39.365 | 110.607 | 64.922 |
| M0317 | China | 39.866 | 109.844 | 64.922 |
| M1213 | China | 39.873 | 111.335 | 64.922 |
| M0198 | China | 39.762 | 111.213 | 66.221 |
| M0364 | China | 39.458 | 110.102 | 66.221 |
| M0340 | China | 39.355 | 110.168 | 66.522 |
| M0307 | China | 39.599 | 118.365 | 67.204 |
| M3725 | China | 37.131 | 111.649 | 68.000 |
| M0335 | China | 37.412 | 110.861 | 68.000 |

|       |       |        |         |        |
|-------|-------|--------|---------|--------|
| M0348 | China | 37.586 | 113.621 | 68.000 |
| M1235 | China | 37.860 | 113.448 | 68.000 |
| M0437 | China | 44.819 | 89.233  | 70.819 |
| M0438 | China | 44.837 | 89.148  | 70.819 |
| M2476 | China | 40.087 | 112.934 | 72.533 |
| M0238 | China | 35.270 | 107.946 | 73.116 |
| M1177 | China | 38.269 | 106.553 | 74.384 |
| M1189 | China | 38.193 | 106.468 | 74.384 |
| M0408 | China | 44.074 | 81.142  | 75.310 |
| M0178 | China | 38.951 | 111.089 | 75.555 |
| M0195 | China | 35.912 | 112.845 | 75.555 |
| M1132 | China | 39.491 | 112.434 | 75.555 |
| M0327 | China | 39.257 | 111.221 | 75.555 |
| M0380 | China | 37.780 | 113.599 | 75.555 |
| M0219 | China | 35.269 | 107.818 | 75.586 |
| M0226 | China | 34.857 | 107.539 | 75.586 |
| M0233 | China | 37.041 | 109.667 | 75.586 |
| M0250 | China | 35.391 | 108.920 | 75.586 |
| M0362 | China | 35.096 | 107.944 | 75.586 |
| M2279 | China | 38.333 | 109.490 | 75.586 |
| M1224 | China | 35.597 | 112.523 | 76.824 |
| M1103 | China | 39.876 | 109.367 | 77.907 |
| M0224 | China | 39.550 | 111.295 | 77.907 |
| M0244 | China | 39.876 | 109.368 | 77.907 |
| M0276 | China | 39.738 | 110.025 | 77.907 |
| M0295 | China | 38.837 | 109.469 | 77.907 |
| M0309 | China | 39.476 | 111.324 | 77.907 |
| M0388 | China | 32.774 | 116.382 | 78.204 |
| M1165 | China | 38.083 | 106.643 | 80.583 |
| M1149 | China | 37.630 | 106.850 | 82.649 |
| M1154 | China | 37.558 | 106.867 | 82.649 |
| M1200 | China | 37.784 | 106.846 | 82.649 |
| M1246 | China | 37.733 | 106.679 | 82.649 |
| M2110 | China | 25.889 | 104.500 | 82.990 |
| M1184 | China | 42.231 | 82.984  | 85.351 |
| M1127 | China | 32.822 | 116.544 | 86.244 |
| M1104 | China | 39.774 | 112.678 | 90.667 |
| M3762 | China | 40.043 | 112.957 | 90.667 |
| M0251 | China | 35.656 | 109.065 | 90.703 |
| M0292 | China | 35.147 | 107.933 | 90.703 |

|       |       |        |         |         |
|-------|-------|--------|---------|---------|
| M0387 | China | 35.083 | 107.984 | 90.703  |
| M0280 | China | 32.805 | 116.285 | 92.867  |
| M0347 | China | 35.597 | 112.523 | 96.030  |
| M0220 | China | 39.725 | 110.065 | 97.384  |
| M0204 | China | 42.382 | 93.018  | 100.413 |
| M0396 | China | 43.546 | 80.961  | 100.413 |
| M0311 | China | 38.126 | 106.729 | 103.311 |
| M0243 | China | 39.292 | 109.684 | 103.876 |
| M0255 | China | 39.048 | 109.501 | 103.876 |
| M0258 | China | 39.217 | 110.006 | 103.876 |
| M1179 | China | 39.200 | 109.884 | 103.876 |
| M0293 | China | 38.902 | 109.539 | 103.876 |
| M0296 | China | 38.060 | 108.973 | 103.876 |
| M0318 | China | 39.866 | 109.844 | 103.876 |
| M0344 | China | 39.018 | 109.622 | 103.876 |
| M0367 | China | 39.676 | 110.001 | 103.876 |
| M0404 | China | 39.807 | 110.153 | 103.876 |
| M0283 | China | 36.374 | 113.020 | 107.289 |
| M0196 | China | 35.613 | 112.726 | 111.870 |
| M0218 | China | 36.152 | 112.991 | 113.333 |
| M0421 | China | 36.364 | 112.858 | 113.333 |
| M0355 | China | 39.947 | 111.220 | 116.860 |
| M0247 | China | 44.519 | 90.314  | 120.496 |
| M0178 | China | 38.951 | 111.089 | 120.889 |
| M0191 | China | 39.881 | 112.993 | 120.889 |
| M3707 | China | 36.363 | 112.976 | 120.889 |
| M0331 | China | 36.256 | 112.919 | 120.889 |
| M0366 | China | 35.702 | 110.686 | 120.889 |
| M0430 | China | 35.995 | 112.887 | 120.889 |
| M0199 | China | 35.062 | 107.960 | 120.938 |
| M0213 | China | 39.196 | 111.132 | 120.938 |
| M1128 | China | 39.279 | 110.394 | 120.938 |
| M0232 | China | 38.531 | 109.872 | 120.938 |
| M0252 | China | 35.661 | 108.919 | 120.938 |
| M0274 | China | 38.794 | 110.246 | 120.938 |
| M0352 | China | 39.134 | 110.347 | 120.938 |
| M3828 | China | 34.877 | 107.512 | 120.938 |
| M0406 | China | 37.871 | 113.520 | 122.400 |
| M0342 | China | 37.943 | 106.697 | 123.973 |
| M0229 | China | 32.821 | 116.546 | 126.249 |

|       |       |        |         |         |
|-------|-------|--------|---------|---------|
| M0405 | China | 37.908 | 113.518 | 128.444 |
| M0208 | China | 32.871 | 116.631 | 129.366 |
| M0190 | China | 39.303 | 109.965 | 129.845 |
| M0222 | China | 40.020 | 109.640 | 129.845 |
| M0282 | China | 39.811 | 111.214 | 129.845 |
| M0435 | China | 39.571 | 110.110 | 129.845 |
| M1191 | China | 39.218 | 110.774 | 136.055 |
| M0210 | China | 40.021 | 112.864 | 151.111 |
| M0264 | China | 39.447 | 112.362 | 151.111 |
| M0265 | China | 39.539 | 112.327 | 151.111 |
| M0305 | China | 37.999 | 111.138 | 151.111 |
| M0385 | China | 38.438 | 109.506 | 151.172 |
| M0419 | China | 38.557 | 109.898 | 151.172 |
| M0427 | China | 38.937 | 110.402 | 151.172 |
| M0353 | China | 39.790 | 110.157 | 155.814 |
| M0410 | China | 38.467 | 108.945 | 155.814 |
| M1175 | China | 37.858 | 106.773 | 165.298 |
| M0302 | China | 37.883 | 106.758 | 165.298 |
| M0424 | China | 37.927 | 106.534 | 165.298 |
| M0253 | China | 39.672 | 111.183 | 168.798 |
| M0287 | China | 39.179 | 112.421 | 181.333 |
| M0384 | China | 38.395 | 111.144 | 181.333 |
| M0383 | China | 38.756 | 109.894 | 196.523 |
| M0417 | China | 39.044 | 110.522 | 196.523 |
| M0326 | China | 39.218 | 110.007 | 207.752 |
| M0358 | China | 39.924 | 113.070 | 226.666 |
| M3823 | China | 38.657 | 111.114 | 226.666 |
| M0177 | China | 38.265 | 109.209 | 226.758 |
| M0242 | China | 38.935 | 110.401 | 226.758 |
| M0319 | China | 38.557 | 109.899 | 226.758 |
| M0382 | China | 38.756 | 109.894 | 226.758 |
| M0187 | China | 40.012 | 111.336 | 233.721 |
| M0363 | China | 40.013 | 113.103 | 241.778 |
| M0231 | China | 39.232 | 110.077 | 241.875 |
| M0291 | China | 38.097 | 106.718 | 247.947 |
| M0403 | China | 38.084 | 106.642 | 247.947 |
| M0268 | China | 38.507 | 109.819 | 256.992 |
| M0186 | China | 39.495 | 109.973 | 259.690 |
| M0351 | China | 39.706 | 111.206 | 259.690 |
| M0426 | China | 32.746 | 116.515 | 265.201 |

|       |                |         |         |         |
|-------|----------------|---------|---------|---------|
| M0202 | China          | 39.263  | 110.234 | 272.109 |
| M0267 | China          | 38.742  | 110.171 | 272.109 |
| M0301 | China          | 39.030  | 110.250 | 272.109 |
| M0200 | China          | 38.422  | 109.277 | 302.344 |
| M3841 | Colombia       | 7.883   | -75.700 | 0.563   |
| M3688 | Colombia       | 9.497   | -73.492 | 0.985   |
| M3842 | Colombia       | 9.630   | -73.561 | 1.520   |
| M3843 | Colombia       | 9.652   | -73.535 | 1.520   |
| M1765 | Colombia       | 6.037   | -75.693 | 1.891   |
| M0443 | Colombia       | 9.575   | -73.485 | 10.693  |
| M0441 | Colombia       | 9.705   | -73.523 | 28.984  |
| M0440 | Colombia       | 11.034  | -72.663 | 32.924  |
| M0448 | Czech Republic | 50.216  | 12.684  | 4.502   |
| M0447 | Czech Republic | 50.543  | 13.525  | 6.289   |
| M0451 | Czech Republic | 50.492  | 13.562  | 9.385   |
| M0450 | Czech Republic | 50.406  | 13.386  | 11.115  |
| M0446 | Czech Republic | 50.570  | 13.711  | 11.397  |
| M0449 | Czech Republic | 49.817  | 18.548  | 35.506  |
| M1544 | Egypt          | 30.707  | 33.382  | 0.177   |
| M1464 | Eswatini       | -27.029 | 31.712  | 3.109   |
| M3845 | Ethiopia       | 7.642   | 36.818  | 4.498   |
| M3227 | Ethiopia       | 9.445   | 35.787  | 8.831   |
| M3846 | Georgia        | 42.339  | 42.989  | 1.766   |
| M1635 | Georgia        | 42.339  | 42.989  | 15.719  |
| M2830 | Germany        | 51.459  | 11.718  | 0.422   |
| M0458 | Germany        | 51.396  | 14.678  | 7.598   |
| M0457 | Germany        | 51.144  | 12.184  | 8.301   |
| M0455 | Germany        | 51.792  | 14.540  | 12.804  |
| M0459 | Germany        | 51.128  | 12.386  | 14.647  |
| M0456 | Germany        | 51.457  | 14.575  | 22.653  |
| M0460 | Germany        | 51.599  | 14.279  | 22.934  |
| M0454 | Germany        | 50.875  | 6.350   | 28.154  |
| M0452 | Germany        | 51.084  | 6.453   | 53.086  |
| M0453 | Germany        | 50.892  | 6.573   | 55.844  |
| M0461 | Greece         | 37.428  | 22.098  | 4.925   |
| M0462 | Greece         | 40.448  | 21.783  | 14.492  |
| M3231 | Hungary        | 46.100  | 18.289  | 0.028   |
| M3230 | Hungary        | 47.887  | 20.718  | 3.518   |
| M3232 | Hungary        | 47.748  | 20.056  | 3.518   |
| M2634 | India          | 23.774  | 86.730  | 0.001   |

|       |       |        |        |       |
|-------|-------|--------|--------|-------|
| M1636 | India | 17.570 | 80.297 | 0.003 |
| M2602 | India | 23.780 | 86.343 | 0.009 |
| M2603 | India | 23.798 | 85.586 | 0.009 |
| M2597 | India | 24.164 | 84.047 | 0.009 |
| M2593 | India | 23.756 | 86.376 | 0.012 |
| M2598 | India | 23.741 | 86.353 | 0.017 |
| M1675 | India | 19.643 | 78.372 | 0.018 |
| M1704 | India | 17.938 | 79.348 | 0.018 |
| M2604 | India | 23.682 | 86.401 | 0.019 |
| M1651 | India | 23.799 | 86.325 | 0.027 |
| M1545 | India | 23.776 | 85.912 | 0.027 |
| M2622 | India | 23.824 | 85.522 | 0.027 |
| M2641 | India | 23.645 | 87.087 | 0.033 |
| M2654 | India | 23.793 | 86.690 | 0.035 |
| M0629 | India | 19.813 | 79.318 | 0.037 |
| M2638 | India | 23.784 | 85.963 | 0.045 |
| M2618 | India | 23.777 | 86.239 | 0.046 |
| M2652 | India | 23.626 | 87.176 | 0.046 |
| M2600 | India | 23.710 | 85.552 | 0.048 |
| M2623 | India | 23.776 | 86.727 | 0.050 |
| M1678 | India | 18.649 | 79.564 | 0.052 |
| M2688 | India | 23.773 | 86.731 | 0.053 |
| M1365 | India | 23.803 | 85.867 | 0.053 |
| M2650 | India | 21.626 | 72.240 | 0.053 |
| M2665 | India | 27.283 | 95.734 | 0.062 |
| M2637 | India | 23.809 | 86.258 | 0.065 |
| M2653 | India | 23.660 | 86.822 | 0.065 |
| M2705 | India | 22.199 | 78.863 | 0.066 |
| M2666 | India | 23.509 | 80.867 | 0.068 |
| M2651 | India | 23.650 | 87.072 | 0.071 |
| M0633 | India | 21.277 | 79.128 | 0.071 |
| M2617 | India | 23.741 | 86.386 | 0.077 |
| M2616 | India | 23.786 | 86.256 | 0.077 |
| M2615 | India | 23.755 | 86.364 | 0.077 |
| M2697 | India | 23.370 | 83.215 | 0.080 |
| M2707 | India | 23.782 | 86.013 | 0.089 |
| M0598 | India | 24.475 | 87.476 | 0.089 |
| M2672 | India | 23.808 | 86.298 | 0.090 |
| M1737 | India | 22.192 | 78.773 | 0.097 |
| M2717 | India | 23.691 | 85.360 | 0.098 |

|       |       |        |        |       |
|-------|-------|--------|--------|-------|
| M2599 | India | 23.695 | 85.302 | 0.102 |
| M1706 | India | 23.382 | 83.023 | 0.104 |
| M2601 | India | 23.674 | 87.033 | 0.111 |
| M2724 | India | 22.162 | 83.532 | 0.116 |
| M2729 | India | 24.173 | 86.254 | 0.116 |
| M2727 | India | 23.776 | 85.912 | 0.116 |
| M2732 | India | 23.773 | 86.398 | 0.116 |
| M1697 | India | 23.346 | 80.871 | 0.125 |
| M2764 | India | 23.645 | 87.186 | 0.126 |
| M2791 | India | 23.759 | 86.773 | 0.130 |
| M1725 | India | 22.865 | 82.299 | 0.130 |
| M1683 | India | 23.158 | 81.938 | 0.134 |
| M2793 | India | 20.114 | 78.896 | 0.134 |
| M2710 | India | 23.698 | 87.254 | 0.139 |
| M2625 | India | 23.655 | 87.045 | 0.139 |
| M2686 | India | 23.773 | 86.718 | 0.139 |
| M2667 | India | 21.323 | 79.045 | 0.139 |
| M3014 | India | 23.810 | 86.292 | 0.143 |
| M1643 | India | 23.587 | 87.086 | 0.143 |
| M2728 | India | 23.650 | 87.072 | 0.147 |
| M2763 | India | 23.386 | 83.018 | 0.151 |
| M2759 | India | 18.606 | 79.390 | 0.151 |
| M2695 | India | 20.927 | 85.125 | 0.156 |
| M1715 | India | 23.356 | 80.974 | 0.156 |
| M2851 | India | 23.626 | 87.176 | 0.167 |
| M2776 | India | 26.012 | 71.135 | 0.169 |
| M3015 | India | 17.208 | 80.802 | 0.169 |
| M0600 | India | 20.030 | 79.314 | 0.169 |
| M2656 | India | 23.690 | 86.915 | 0.174 |
| M2902 | India | 23.662 | 87.114 | 0.176 |
| M2657 | India | 23.635 | 87.179 | 0.181 |
| M2792 | India | 23.787 | 85.924 | 0.187 |
| M2624 | India | 23.694 | 86.875 | 0.188 |
| M2626 | India | 23.685 | 86.890 | 0.188 |
| M1644 | India | 23.800 | 86.696 | 0.194 |
| M2777 | India | 23.784 | 86.719 | 0.195 |
| M2690 | India | 19.906 | 79.311 | 0.200 |
| M2723 | India | 21.299 | 79.123 | 0.203 |
| M1724 | India | 23.756 | 86.836 | 0.205 |
| M1738 | India | 23.723 | 84.611 | 0.205 |



|       |       |        |        |       |
|-------|-------|--------|--------|-------|
| M1662 | India | 23.189 | 81.932 | 0.209 |
| M2687 | India | 23.207 | 83.006 | 0.209 |
| M2807 | India | 23.804 | 86.377 | 0.214 |
| M2854 | India | 21.782 | 83.915 | 0.215 |
| M2708 | India | 19.843 | 79.348 | 0.229 |
| M3010 | India | 21.834 | 83.919 | 0.230 |
| M1733 | India | 19.018 | 79.511 | 0.235 |
| M2897 | India | 19.833 | 79.346 | 0.236 |
| M1744 | India | 21.735 | 83.989 | 0.241 |
| M1745 | India | 21.735 | 83.989 | 0.241 |
| M2644 | India | 23.655 | 87.198 | 0.244 |
| M2668 | India | 23.601 | 87.187 | 0.249 |
| M2821 | India | 18.464 | 79.861 | 0.250 |
| M2822 | India | 21.431 | 73.113 | 0.250 |
| M2706 | India | 23.815 | 86.995 | 0.258 |
| M2826 | India | 27.030 | 74.024 | 0.258 |
| M2825 | India | 25.961 | 71.274 | 0.258 |
| M3013 | India | 22.368 | 82.632 | 0.261 |
| M2831 | India | 19.853 | 78.786 | 0.267 |
| M2889 | India | 23.643 | 87.182 | 0.271 |
| M2752 | India | 19.960 | 79.311 | 0.281 |
| M1711 | India | 23.186 | 81.987 | 0.282 |
| M3867 | India | 20.869 | 79.192 | 0.285 |
| M2834 | India | 23.833 | 85.473 | 0.285 |
| M2643 | India | 23.705 | 86.909 | 0.286 |
| M2855 | India | 23.759 | 86.755 | 0.286 |
| M1648 | India | 23.230 | 83.010 | 0.287 |
| M2772 | India | 23.667 | 86.417 | 0.300 |
| M1684 | India | 23.168 | 81.942 | 0.307 |
| M0574 | India | 22.320 | 82.717 | 0.312 |
| M1647 | India | 22.354 | 82.617 | 0.313 |
| M2720 | India | 18.949 | 79.481 | 0.313 |
| M2635 | India | 23.634 | 87.204 | 0.321 |
| M2670 | India | 23.650 | 87.184 | 0.327 |
| M2722 | India | 22.239 | 78.931 | 0.330 |
| M2658 | India | 23.678 | 86.827 | 0.334 |
| M2852 | India | 23.796 | 86.331 | 0.339 |
| M2733 | India | 18.992 | 79.480 | 0.339 |
| M2734 | India | 18.896 | 79.492 | 0.339 |
| M1730 | India | 23.101 | 82.928 | 0.339 |

|       |       |        |        |       |
|-------|-------|--------|--------|-------|
| M2655 | India | 23.685 | 86.860 | 0.355 |
| M1653 | India | 23.424 | 87.285 | 0.356 |
| M1654 | India | 23.783 | 86.719 | 0.361 |
| M2669 | India | 23.683 | 87.070 | 0.362 |
| M2743 | India | 18.828 | 79.483 | 0.365 |
| M1660 | India | 19.209 | 79.348 | 0.365 |
| M2709 | India | 22.181 | 78.770 | 0.368 |
| M2749 | India | 23.666 | 87.162 | 0.374 |
| M2862 | India | 23.694 | 85.358 | 0.374 |
| M2893 | India | 19.965 | 78.833 | 0.380 |
| M2636 | India | 23.695 | 86.890 | 0.390 |
| M1714 | India | 23.367 | 83.098 | 0.391 |
| M1750 | India | 23.500 | 80.830 | 0.391 |
| M1751 | India | 17.487 | 80.658 | 0.391 |
| M2753 | India | 23.652 | 87.163 | 0.396 |
| M2869 | India | 27.294 | 95.755 | 0.401 |
| M1665 | India | 23.657 | 85.365 | 0.408 |
| M2870 | India | 23.768 | 85.554 | 0.410 |
| M2750 | India | 23.174 | 82.335 | 0.417 |
| M2751 | India | 23.336 | 80.906 | 0.417 |
| M1742 | India | 18.850 | 79.483 | 0.417 |
| M1754 | India | 23.336 | 80.906 | 0.417 |
| M2874 | India | 23.651 | 85.566 | 0.437 |
| M1755 | India | 23.197 | 82.162 | 0.443 |
| M0562 | India | 24.124 | 82.743 | 0.446 |
| M2875 | India | 23.798 | 85.586 | 0.446 |
| M2877 | India | 23.664 | 85.001 | 0.454 |
| M2912 | India | 20.083 | 79.033 | 0.456 |
| M0536 | India | 23.788 | 86.979 | 0.466 |
| M0523 | India | 22.119 | 83.534 | 0.474 |
| M0485 | India | 20.057 | 79.267 | 0.477 |
| M2883 | India | 23.801 | 86.371 | 0.481 |
| M2699 | India | 23.650 | 87.072 | 0.489 |
| M2884 | India | 22.150 | 83.542 | 0.490 |
| M2701 | India | 23.650 | 87.209 | 0.495 |
| M1695 | India | 18.466 | 79.841 | 0.495 |
| M1743 | India | 22.368 | 82.632 | 0.495 |
| M0640 | India | 22.178 | 83.355 | 0.495 |
| M2859 | India | 23.770 | 86.878 | 0.495 |
| M1657 | India | 23.770 | 86.415 | 0.503 |

|       |       |        |        |       |
|-------|-------|--------|--------|-------|
| M1637 | India | 23.800 | 86.277 | 0.517 |
| M1674 | India | 22.462 | 82.563 | 0.521 |
| M1676 | India | 18.721 | 79.645 | 0.521 |
| M2890 | India | 23.664 | 85.001 | 0.526 |
| M2888 | India | 23.798 | 85.586 | 0.526 |
| M2589 | India | 19.100 | 79.857 | 0.535 |
| M2892 | India | 19.774 | 79.290 | 0.535 |
| M2671 | India | 23.641 | 87.223 | 0.537 |
| M0464 | India | 21.347 | 78.954 | 0.541 |
| M2896 | India | 23.800 | 86.356 | 0.544 |
| M2794 | India | 17.512 | 80.672 | 0.547 |
| M2910 | India | 21.269 | 79.157 | 0.564 |
| M1721 | India | 23.208 | 82.124 | 0.571 |
| M2849 | India | 22.150 | 78.100 | 0.573 |
| M1666 | India | 23.259 | 82.123 | 0.573 |
| M1673 | India | 23.142 | 81.471 | 0.573 |
| M1699 | India | 19.035 | 79.430 | 0.573 |
| M2903 | India | 27.523 | 72.513 | 0.597 |
| M2800 | India | 18.806 | 79.521 | 0.599 |
| M1664 | India | 23.657 | 85.365 | 0.606 |
| M1641 | India | 23.650 | 87.072 | 0.620 |
| M1698 | India | 23.155 | 81.483 | 0.626 |
| M1720 | India | 22.391 | 82.824 | 0.626 |
| M2739 | India | 23.673 | 87.203 | 0.631 |
| M2812 | India | 23.110 | 82.905 | 0.652 |
| M1701 | India | 23.360 | 82.681 | 0.652 |
| M1690 | India | 20.058 | 79.052 | 0.658 |
| M2719 | India | 23.650 | 87.130 | 0.662 |
| M2740 | India | 23.769 | 86.844 | 0.671 |
| M0520 | India | 22.119 | 83.534 | 0.677 |
| M1680 | India | 23.224 | 82.150 | 0.684 |
| M0579 | India | 23.787 | 86.950 | 0.685 |
| M2817 | India | 20.330 | 78.958 | 0.704 |
| M2773 | India | 22.186 | 78.323 | 0.709 |
| M1700 | India | 24.133 | 84.082 | 0.713 |
| M2770 | India | 23.805 | 86.675 | 0.724 |
| M1655 | India | 23.137 | 82.066 | 0.730 |
| M1741 | India | 18.750 | 79.250 | 0.730 |
| M2916 | India | 23.773 | 86.400 | 0.740 |
| M1734 | India | 23.208 | 81.590 | 0.749 |

|       |       |        |        |       |
|-------|-------|--------|--------|-------|
| M2698 | India | 23.682 | 87.276 | 0.757 |
| M1646 | India | 23.654 | 87.188 | 0.780 |
| M2919 | India | 23.776 | 85.912 | 0.784 |
| M2833 | India | 23.350 | 83.074 | 0.808 |
| M2963 | India | 25.514 | 71.244 | 0.811 |
| M2962 | India | 23.798 | 85.586 | 0.811 |
| M2964 | India | 21.709 | 73.230 | 0.820 |
| M1726 | India | 18.880 | 79.502 | 0.834 |
| M2899 | India | 19.787 | 79.297 | 0.841 |
| M1705 | India | 23.178 | 82.368 | 0.860 |
| M1687 | India | 23.350 | 82.729 | 0.886 |
| M1691 | India | 18.466 | 79.841 | 0.886 |
| M1694 | India | 18.434 | 79.859 | 0.886 |
| M1727 | India | 18.865 | 79.511 | 0.886 |
| M0474 | India | 24.134 | 82.593 | 0.891 |
| M0481 | India | 22.059 | 83.730 | 0.891 |
| M0496 | India | 22.781 | 82.477 | 0.891 |
| M0522 | India | 22.119 | 83.534 | 0.891 |
| M0556 | India | 24.132 | 82.714 | 0.891 |
| M0563 | India | 22.034 | 83.735 | 0.891 |
| M0582 | India | 23.808 | 86.239 | 0.891 |
| M2500 | India | 23.724 | 87.233 | 0.909 |
| M1716 | India | 23.195 | 82.349 | 0.912 |
| M1718 | India | 23.350 | 82.729 | 0.912 |
| M2746 | India | 23.661 | 87.275 | 0.913 |
| M2498 | India | 23.699 | 85.293 | 0.927 |
| M2754 | India | 23.652 | 87.173 | 0.962 |
| M1710 | India | 18.781 | 79.940 | 0.962 |
| M1739 | India | 22.441 | 82.568 | 0.990 |
| M1656 | India | 23.731 | 86.756 | 0.991 |
| M0633 | India | 21.277 | 79.128 | 0.998 |
| M2904 | India | 23.809 | 86.342 | 1.000 |
| M1708 | India | 20.865 | 79.286 | 1.007 |
| M1645 | India | 22.455 | 82.518 | 1.016 |
| M1728 | India | 18.872 | 79.521 | 1.043 |
| M1729 | India | 18.841 | 79.217 | 1.043 |
| M0631 | India | 23.793 | 86.350 | 1.043 |
| M0642 | India | 23.709 | 84.987 | 1.043 |
| M0509 | India | 23.154 | 81.584 | 1.069 |
| M1367 | India | 23.739 | 85.486 | 1.069 |

|       |       |        |        |       |
|-------|-------|--------|--------|-------|
| M1663 | India | 23.371 | 82.992 | 1.095 |
| M1752 | India | 17.452 | 80.667 | 1.095 |
| M2766 | India | 23.628 | 87.195 | 1.101 |
| M0637 | India | 21.357 | 73.070 | 1.132 |
| M2842 | India | 22.281 | 78.989 | 1.135 |
| M2850 | India | 23.707 | 87.350 | 1.150 |
| M0485 | India | 20.057 | 79.267 | 1.160 |
| M1731 | India | 21.358 | 78.930 | 1.173 |
| M1650 | India | 23.659 | 87.237 | 1.198 |
| M1361 | India | 27.829 | 73.220 | 1.203 |
| M2503 | India | 23.731 | 68.819 | 1.212 |
| M2835 | India | 23.682 | 86.401 | 1.239 |
| M1722 | India | 23.615 | 85.682 | 1.248 |
| M0622 | India | 23.862 | 85.557 | 1.248 |
| M2873 | India | 23.679 | 85.045 | 1.251 |
| M2505 | India | 23.767 | 85.986 | 1.274 |
| M2966 | India | 23.805 | 87.026 | 1.302 |
| M1753 | India | 22.854 | 82.321 | 1.303 |
| M0493 | India | 22.100 | 83.110 | 1.310 |
| M0566 | India | 21.745 | 83.840 | 1.337 |
| M0591 | India | 24.135 | 82.599 | 1.337 |
| M0638 | India | 20.181 | 79.083 | 1.337 |
| M0645 | India | 20.021 | 79.068 | 1.337 |
| M1677 | India | 18.746 | 79.508 | 1.355 |
| M0515 | India | 21.952 | 83.808 | 1.372 |
| M1659 | India | 23.282 | 82.094 | 1.460 |
| M0467 | India | 23.158 | 82.062 | 1.461 |
| M0487 | India | 22.247 | 83.383 | 1.470 |
| M0585 | India | 20.135 | 79.021 | 1.485 |
| M0518 | India | 23.757 | 86.409 | 1.488 |
| M0636 | India | 18.524 | 79.750 | 1.491 |
| M0551 | India | 19.010 | 79.465 | 1.559 |
| M0576 | India | 17.976 | 80.835 | 1.604 |
| M0517 | India | 20.008 | 79.299 | 1.640 |
| M3016 | India | 23.803 | 85.867 | 1.640 |
| M0628 | India | 23.800 | 87.045 | 1.657 |
| M0528 | India | 20.670 | 79.296 | 1.666 |
| M1649 | India | 23.152 | 81.539 | 1.694 |
| M1717 | India | 20.119 | 79.032 | 1.720 |
| M2816 | India | 23.667 | 87.205 | 1.734 |

|       |       |        |        |       |
|-------|-------|--------|--------|-------|
| M2511 | India | 24.171 | 82.756 | 1.782 |
| M1707 | India | 23.353 | 83.226 | 1.782 |
| M0611 | India | 23.708 | 84.986 | 1.782 |
| M0621 | India | 18.927 | 79.489 | 1.782 |
| M1652 | India | 23.642 | 87.139 | 1.791 |
| M0495 | India | 24.119 | 86.864 | 1.871 |
| M1735 | India | 23.240 | 82.112 | 1.877 |
| M0616 | India | 23.756 | 86.421 | 1.960 |
| M0630 | India | 23.775 | 85.542 | 1.960 |
| M2513 | India | 23.749 | 86.421 | 1.987 |
| M0540 | India | 22.271 | 83.281 | 1.996 |
| M2845 | India | 23.727 | 87.229 | 1.998 |
| M0591 | India | 24.135 | 82.599 | 2.005 |
| M1679 | India | 18.692 | 79.549 | 2.085 |
| M1703 | India | 23.160 | 81.461 | 2.137 |
| M0619 | India | 18.678 | 79.541 | 2.139 |
| M0469 | India | 20.228 | 78.917 | 2.154 |
| M0583 | India | 23.703 | 86.440 | 2.228 |
| M0539 | India | 22.106 | 83.593 | 2.317 |
| M0557 | India | 19.256 | 79.267 | 2.317 |
| M0620 | India | 18.698 | 79.535 | 2.317 |
| M0545 | India | 24.212 | 82.698 | 2.344 |
| M2844 | India | 23.650 | 87.072 | 2.348 |
| M0607 | India | 23.782 | 86.227 | 2.388 |
| M0479 | India | 22.268 | 83.346 | 2.406 |
| M2868 | India | 22.179 | 78.678 | 2.451 |
| M0471 | India | 24.135 | 82.426 | 2.495 |
| M0595 | India | 23.702 | 85.294 | 2.495 |
| M2515 | India | 23.511 | 68.959 | 2.540 |
| M0623 | India | 23.685 | 84.989 | 2.584 |
| M1747 | India | 22.138 | 78.171 | 2.635 |
| M2516 | India | 11.574 | 79.518 | 2.647 |
| M0587 | India | 11.574 | 79.518 | 2.647 |
| M1740 | India | 18.818 | 79.481 | 2.647 |
| M3854 | India | 23.453 | 87.239 | 2.673 |
| M0610 | India | 17.939 | 80.778 | 2.673 |
| M1669 | India | 23.659 | 86.450 | 2.675 |
| M2689 | India | 22.142 | 78.100 | 2.686 |
| M0573 | India | 21.417 | 73.100 | 2.762 |
| M0494 | India | 23.184 | 82.337 | 2.789 |

|       |       |        |        |       |
|-------|-------|--------|--------|-------|
| M2886 | India | 21.672 | 72.237 | 2.825 |
| M2512 | India | 19.827 | 79.255 | 2.896 |
| M0555 | India | 23.792 | 85.973 | 2.941 |
| M0541 | India | 17.578 | 80.323 | 3.030 |
| M0529 | India | 21.266 | 79.192 | 3.119 |
| M0561 | India | 17.626 | 80.485 | 3.119 |
| M0647 | India | 20.846 | 79.272 | 3.163 |
| M1366 | India | 18.457 | 79.857 | 3.310 |
| M0571 | India | 20.876 | 79.224 | 3.315 |
| M0593 | India | 19.996 | 79.083 | 3.342 |
| M0472 | India | 23.168 | 81.596 | 3.414 |
| M0508 | India | 23.790 | 86.915 | 3.484 |
| M0532 | India | 17.262 | 80.374 | 3.564 |
| M2965 | India | 23.783 | 86.396 | 3.679 |
| M0581 | India | 19.894 | 79.116 | 3.713 |
| M0608 | India | 23.724 | 85.038 | 3.832 |
| M0466 | India | 23.791 | 85.920 | 4.010 |
| M0553 | India | 25.942 | 71.344 | 4.010 |
| M0565 | India | 21.814 | 83.901 | 4.010 |
| M0618 | India | 18.666 | 79.539 | 4.099 |
| M1672 | India | 23.336 | 82.520 | 4.144 |
| M0547 | India | 17.095 | 80.454 | 4.277 |
| M0574 | India | 22.320 | 82.717 | 4.366 |
| M3907 | India | 23.928 | 82.319 | 4.456 |
| M0609 | India | 17.941 | 80.772 | 4.473 |
| M2915 | India | 23.648 | 87.258 | 4.494 |
| M0626 | India | 21.806 | 83.904 | 4.625 |
| M0569 | India | 23.889 | 85.002 | 4.643 |
| M2502 | India | 23.803 | 86.278 | 4.647 |
| M0649 | India | 23.793 | 85.554 | 4.723 |
| M0490 | India | 24.175 | 82.560 | 4.874 |
| M0617 | India | 25.038 | 87.354 | 4.876 |
| M0465 | India | 18.665 | 79.579 | 5.369 |
| M0606 | India | 19.862 | 79.139 | 5.614 |
| M0478 | India | 20.962 | 85.178 | 5.819 |
| M0543 | India | 23.665 | 87.313 | 5.853 |
| M1686 | India | 23.708 | 86.400 | 5.940 |
| M3863 | India | 24.000 | 85.360 | 6.238 |
| M0562 | India | 24.124 | 82.743 | 6.238 |
| M0537 | India | 20.950 | 85.148 | 6.264 |

|       |           |        |         |        |
|-------|-----------|--------|---------|--------|
| M0489 | India     | 23.757 | 86.794  | 6.583  |
| M0488 | India     | 24.148 | 82.748  | 6.683  |
| M0533 | India     | 20.966 | 85.016  | 6.897  |
| M0588 | India     | 11.571 | 79.504  | 7.111  |
| M0559 | India     | 23.736 | 86.450  | 7.358  |
| M0484 | India     | 20.958 | 85.129  | 8.243  |
| M0601 | India     | 23.882 | 85.234  | 8.394  |
| M0634 | India     | 23.688 | 87.224  | 8.574  |
| M0552 | India     | 21.096 | 85.079  | 9.000  |
| M0477 | India     | 23.724 | 85.038  | 9.374  |
| M2881 | India     | 23.741 | 86.352  | 9.759  |
| M0589 | India     | 11.520 | 79.476  | 11.148 |
| M0475 | India     | 23.889 | 85.002  | 11.397 |
| M0556 | India     | 24.132 | 82.714  | 11.745 |
| M0474 | India     | 24.134 | 82.593  | 12.003 |
| M0524 | India     | 22.035 | 83.743  | 12.074 |
| M0476 | India     | 20.944 | 85.164  | 12.101 |
| M0563 | India     | 22.034 | 83.735  | 12.143 |
| M0604 | India     | 22.838 | 82.814  | 13.367 |
| M0514 | India     | 24.165 | 82.673  | 15.755 |
| M0468 | India     | 23.808 | 86.322  | 16.265 |
| M0580 | India     | 24.135 | 82.599  | 16.663 |
| M0542 | India     | 24.158 | 82.655  | 17.403 |
| M0591 | India     | 24.135 | 82.599  | 17.457 |
| M0566 | India     | 21.745 | 83.840  | 18.686 |
| M0535 | India     | 21.771 | 83.854  | 18.713 |
| M0513 | India     | 22.345 | 82.544  | 19.364 |
| M0564 | India     | 22.333 | 82.667  | 20.050 |
| M0564 | India     | 22.333 | 82.667  | 20.317 |
| M0486 | India     | 20.962 | 85.160  | 24.951 |
| M0527 | India     | 22.336 | 82.546  | 27.036 |
| M4070 | Indonesia | -1.827 | 115.239 | 0.001  |
| M3959 | Indonesia | -3.752 | 102.484 | 0.001  |
| M3961 | Indonesia | -1.038 | 114.752 | 0.001  |
| M4120 | Indonesia | -0.536 | 116.295 | 0.001  |
| M4155 | Indonesia | -4.657 | 119.937 | 0.001  |
| M4102 | Indonesia | -0.483 | 117.194 | 0.003  |
| M4063 | Indonesia | 0.302  | 116.387 | 0.004  |
| M4022 | Indonesia | -0.999 | 113.884 | 0.004  |
| M4113 | Indonesia | -2.123 | 102.969 | 0.005  |



|       |           |        |         |       |
|-------|-----------|--------|---------|-------|
| M1480 | Indonesia | -2.623 | 104.128 | 0.006 |
| M4060 | Indonesia | -0.796 | 117.090 | 0.006 |
| M4109 | Indonesia | -1.994 | 115.153 | 0.006 |
| M4002 | Indonesia | -1.454 | 102.655 | 0.008 |
| M3923 | Indonesia | -0.998 | 116.935 | 0.010 |
| M3995 | Indonesia | -3.933 | 114.886 | 0.010 |
| M4005 | Indonesia | -0.340 | 117.287 | 0.013 |
| M1507 | Indonesia | -2.033 | 116.400 | 0.014 |
| M3975 | Indonesia | -0.599 | 117.253 | 0.018 |
| M4165 | Indonesia | -3.696 | 115.623 | 0.018 |
| M3998 | Indonesia | -0.042 | 115.586 | 0.020 |
| M4034 | Indonesia | -2.808 | 115.379 | 0.020 |
| M4186 | Indonesia | -1.661 | 116.203 | 0.020 |
| M3939 | Indonesia | -2.804 | 115.377 | 0.021 |
| M4009 | Indonesia | -2.052 | 115.604 | 0.021 |
| M4040 | Indonesia | 1.098  | 116.164 | 0.021 |
| M3994 | Indonesia | -2.892 | 115.494 | 0.023 |
| M4162 | Indonesia | 0.516  | 115.802 | 0.023 |
| M3955 | Indonesia | -0.332 | 117.043 | 0.024 |
| M3982 | Indonesia | 0.099  | 114.379 | 0.024 |
| M4228 | Indonesia | -2.684 | 116.228 | 0.024 |
| M4012 | Indonesia | -0.903 | 116.897 | 0.027 |
| M4058 | Indonesia | -1.587 | 101.944 | 0.027 |
| M4029 | Indonesia | 0.521  | 115.806 | 0.028 |
| M1491 | Indonesia | -2.508 | 103.154 | 0.028 |
| M3279 | Indonesia | 3.215  | 117.056 | 0.028 |
| M4206 | Indonesia | -2.516 | 104.046 | 0.028 |
| M3938 | Indonesia | -1.092 | 116.928 | 0.031 |
| M4046 | Indonesia | -3.470 | 115.584 | 0.031 |
| M4147 | Indonesia | -0.764 | 117.231 | 0.031 |
| M4168 | Indonesia | -3.696 | 115.624 | 0.031 |
| M4135 | Indonesia | -0.455 | 117.067 | 0.032 |
| M3914 | Indonesia | -0.756 | 117.056 | 0.032 |
| M4019 | Indonesia | -3.656 | 103.810 | 0.034 |
| M4033 | Indonesia | -0.984 | 114.931 | 0.034 |
| M3929 | Indonesia | -3.912 | 114.942 | 0.035 |
| M3981 | Indonesia | -0.794 | 117.188 | 0.035 |
| M4134 | Indonesia | -3.251 | 114.974 | 0.035 |
| M4151 | Indonesia | -1.755 | 115.384 | 0.035 |
| M4188 | Indonesia | -2.939 | 116.261 | 0.037 |

|       |           |        |         |       |
|-------|-----------|--------|---------|-------|
| M4153 | Indonesia | -0.614 | 100.766 | 0.038 |
| M4129 | Indonesia | -0.894 | 114.627 | 0.039 |
| M4187 | Indonesia | -3.769 | 103.602 | 0.039 |
| M3960 | Indonesia | -3.776 | 115.432 | 0.042 |
| M1482 | Indonesia | -4.026 | 102.582 | 0.042 |
| M4050 | Indonesia | 0.077  | 115.967 | 0.042 |
| M4067 | Indonesia | -3.213 | 101.822 | 0.042 |
| M4011 | Indonesia | -1.682 | 103.691 | 0.044 |
| M4202 | Indonesia | -1.424 | 102.744 | 0.044 |
| M3967 | Indonesia | -0.429 | 116.517 | 0.045 |
| M3992 | Indonesia | -1.013 | 117.012 | 0.046 |
| M4172 | Indonesia | -0.187 | 116.959 | 0.046 |
| M4088 | Indonesia | -1.093 | 117.016 | 0.048 |
| M4051 | Indonesia | -3.199 | 115.653 | 0.052 |
| M4191 | Indonesia | -3.397 | 115.456 | 0.052 |
| M3935 | Indonesia | -3.809 | 115.339 | 0.056 |
| M4069 | Indonesia | 0.626  | 117.065 | 0.056 |
| M4122 | Indonesia | -3.408 | 115.351 | 0.056 |
| M4145 | Indonesia | -0.650 | 114.980 | 0.057 |
| M3963 | Indonesia | -1.091 | 116.930 | 0.061 |
| M3965 | Indonesia | -3.869 | 115.041 | 0.062 |
| M3978 | Indonesia | 0.100  | 114.379 | 0.062 |
| M4008 | Indonesia | -2.116 | 116.053 | 0.063 |
| M4221 | Indonesia | -1.103 | 114.719 | 0.065 |
| M4104 | Indonesia | -0.402 | 117.124 | 0.065 |
| M3973 | Indonesia | -3.030 | 115.168 | 0.066 |
| M3991 | Indonesia | -3.870 | 115.192 | 0.066 |
| M4004 | Indonesia | -0.588 | 100.800 | 0.066 |
| M4177 | Indonesia | -3.833 | 103.694 | 0.066 |
| M4106 | Indonesia | -1.750 | 116.061 | 0.069 |
| M4208 | Indonesia | 1.054  | 117.318 | 0.069 |
| M4190 | Indonesia | -1.080 | 114.792 | 0.075 |
| M4074 | Indonesia | -1.806 | 102.896 | 0.077 |
| M4094 | Indonesia | -0.283 | 116.777 | 0.077 |
| M3953 | Indonesia | 1.081  | 117.722 | 0.080 |
| M4114 | Indonesia | -1.969 | 115.387 | 0.080 |
| M0656 | Indonesia | -3.731 | 115.611 | 0.082 |
| M4110 | Indonesia | -3.724 | 115.452 | 0.083 |
| M4163 | Indonesia | -1.079 | 117.021 | 0.084 |
| M1500 | Indonesia | -3.165 | 115.103 | 0.084 |

|       |           |        |         |       |
|-------|-----------|--------|---------|-------|
| M4142 | Indonesia | -0.756 | 117.230 | 0.086 |
| M4028 | Indonesia | -0.621 | 100.786 | 0.087 |
| M3966 | Indonesia | -1.774 | 103.466 | 0.093 |
| M3990 | Indonesia | -3.782 | 115.045 | 0.097 |
| M4079 | Indonesia | -2.036 | 116.252 | 0.097 |
| M3265 | Indonesia | -0.787 | 117.129 | 0.098 |
| M1483 | Indonesia | -0.421 | 115.912 | 0.098 |
| M4223 | Indonesia | -3.868 | 115.152 | 0.100 |
| M4091 | Indonesia | -3.790 | 103.683 | 0.101 |
| M4144 | Indonesia | -1.452 | 115.168 | 0.107 |
| M4055 | Indonesia | -0.099 | 116.834 | 0.108 |
| M4025 | Indonesia | -0.295 | 117.146 | 0.113 |
| M3274 | Indonesia | -1.617 | 103.586 | 0.113 |
| M1493 | Indonesia | -2.176 | 115.545 | 0.113 |
| M3916 | Indonesia | -3.215 | 115.021 | 0.117 |
| M3970 | Indonesia | -3.804 | 103.645 | 0.118 |
| M3972 | Indonesia | -3.845 | 102.343 | 0.120 |
| M3932 | Indonesia | -0.653 | 117.184 | 0.121 |
| M3971 | Indonesia | -0.427 | 116.845 | 0.122 |
| M3986 | Indonesia | -0.999 | 116.936 | 0.122 |
| M4125 | Indonesia | 3.040  | 117.276 | 0.124 |
| M4049 | Indonesia | -0.796 | 117.201 | 0.125 |
| M4101 | Indonesia | -3.424 | 115.494 | 0.125 |
| M3270 | Indonesia | -3.158 | 115.110 | 0.127 |
| M1494 | Indonesia | 2.083  | 117.351 | 0.127 |
| M4215 | Indonesia | -3.172 | 115.996 | 0.131 |
| M3974 | Indonesia | -3.753 | 103.545 | 0.138 |
| M4052 | Indonesia | -3.239 | 115.150 | 0.138 |
| M3987 | Indonesia | -1.740 | 116.174 | 0.139 |
| M1495 | Indonesia | -2.945 | 115.224 | 0.141 |
| M4126 | Indonesia | 0.146  | 117.292 | 0.142 |
| M4201 | Indonesia | -1.181 | 102.423 | 0.146 |
| M3937 | Indonesia | -1.793 | 102.989 | 0.152 |
| M3962 | Indonesia | -3.961 | 114.852 | 0.152 |
| M4073 | Indonesia | -1.003 | 116.957 | 0.152 |
| M1484 | Indonesia | -3.419 | 114.851 | 0.155 |
| M4156 | Indonesia | 0.384  | 117.175 | 0.155 |
| M3979 | Indonesia | -1.983 | 115.567 | 0.158 |
| M4164 | Indonesia | 0.055  | 117.197 | 0.158 |
| M3985 | Indonesia | -1.617 | 101.916 | 0.160 |

|       |           |        |         |       |
|-------|-----------|--------|---------|-------|
| M4216 | Indonesia | -1.883 | 115.294 | 0.162 |
| M3909 | Indonesia | -1.557 | 102.743 | 0.163 |
| M3940 | Indonesia | -3.241 | 115.119 | 0.163 |
| M3957 | Indonesia | -0.543 | 117.148 | 0.163 |
| M4039 | Indonesia | 0.779  | 117.517 | 0.163 |
| M4195 | Indonesia | -3.218 | 115.021 | 0.165 |
| M1512 | Indonesia | -1.961 | 115.868 | 0.169 |
| M3278 | Indonesia | -2.019 | 102.990 | 0.169 |
| M4087 | Indonesia | -1.984 | 115.339 | 0.174 |
| M3976 | Indonesia | -2.033 | 115.411 | 0.179 |
| M4173 | Indonesia | 2.061  | 117.362 | 0.180 |
| M4090 | Indonesia | -0.796 | 117.072 | 0.182 |
| M3934 | Indonesia | -0.410 | 117.025 | 0.183 |
| M4149 | Indonesia | -0.456 | 117.228 | 0.184 |
| M4130 | Indonesia | -3.817 | 115.000 | 0.187 |
| M3933 | Indonesia | -0.585 | 114.795 | 0.189 |
| M4146 | Indonesia | -0.717 | 117.079 | 0.191 |
| M1490 | Indonesia | 0.371  | 116.136 | 0.197 |
| M3936 | Indonesia | -3.205 | 101.826 | 0.198 |
| M4227 | Indonesia | -1.072 | 114.528 | 0.201 |
| M4035 | Indonesia | -3.053 | 115.164 | 0.210 |
| M4053 | Indonesia | 2.059  | 117.144 | 0.210 |
| M4064 | Indonesia | -3.381 | 101.828 | 0.211 |
| M4200 | Indonesia | -0.398 | 117.295 | 0.212 |
| M4003 | Indonesia | -3.220 | 115.838 | 0.217 |
| M4225 | Indonesia | -3.721 | 115.184 | 0.221 |
| M1511 | Indonesia | -3.311 | 114.567 | 0.225 |
| M4180 | Indonesia | -0.996 | 117.031 | 0.227 |
| M4196 | Indonesia | -1.650 | 101.941 | 0.227 |
| M4124 | Indonesia | -3.501 | 115.587 | 0.229 |
| M3984 | Indonesia | -0.671 | 117.179 | 0.232 |
| M4214 | Indonesia | 3.046  | 117.276 | 0.232 |
| M3927 | Indonesia | -3.207 | 115.007 | 0.234 |
| M4010 | Indonesia | -0.764 | 117.132 | 0.238 |
| M4056 | Indonesia | -3.470 | 115.583 | 0.239 |
| M4157 | Indonesia | -3.944 | 114.883 | 0.243 |
| M4160 | Indonesia | -3.758 | 115.390 | 0.243 |
| M3944 | Indonesia | -0.994 | 102.716 | 0.246 |
| M4212 | Indonesia | -2.963 | 115.198 | 0.252 |
| M3910 | Indonesia | -3.696 | 115.623 | 0.253 |

|       |           |        |         |       |
|-------|-----------|--------|---------|-------|
| M4136 | Indonesia | -2.996 | 115.212 | 0.255 |
| M3993 | Indonesia | -2.165 | 103.753 | 0.256 |
| M4107 | Indonesia | -3.200 | 115.089 | 0.256 |
| M4138 | Indonesia | -0.608 | 101.911 | 0.256 |
| M3917 | Indonesia | -3.317 | 114.937 | 0.267 |
| M4075 | Indonesia | -3.141 | 101.740 | 0.272 |
| M4139 | Indonesia | 3.091  | 117.215 | 0.273 |
| M4167 | Indonesia | -3.396 | 115.632 | 0.283 |
| M3956 | Indonesia | -1.736 | 102.965 | 0.287 |
| M4192 | Indonesia | -3.813 | 115.281 | 0.291 |
| M1481 | Indonesia | -3.136 | 115.185 | 0.295 |
| M1486 | Indonesia | -1.968 | 103.007 | 0.295 |
| M3275 | Indonesia | -0.503 | 117.046 | 0.295 |
| M4175 | Indonesia | -0.642 | 117.192 | 0.295 |
| M4099 | Indonesia | -0.358 | 117.075 | 0.297 |
| M3911 | Indonesia | 4.126  | 117.198 | 0.301 |
| M4209 | Indonesia | -3.751 | 103.560 | 0.307 |
| M4096 | Indonesia | -0.228 | 117.116 | 0.312 |
| M1513 | Indonesia | -0.316 | 117.379 | 0.324 |
| M3948 | Indonesia | -0.770 | 117.068 | 0.338 |
| M1488 | Indonesia | -3.336 | 115.667 | 0.338 |
| M1496 | Indonesia | -0.635 | 117.190 | 0.338 |
| M4224 | Indonesia | -1.523 | 102.764 | 0.339 |
| M4161 | Indonesia | 0.385  | 116.205 | 0.346 |
| M4105 | Indonesia | 0.265  | 115.873 | 0.352 |
| M3942 | Indonesia | -3.802 | 103.603 | 0.357 |
| M4001 | Indonesia | -1.145 | 114.682 | 0.362 |
| M3958 | Indonesia | -3.170 | 101.784 | 0.369 |
| M3977 | Indonesia | -4.084 | 104.177 | 0.371 |
| M3919 | Indonesia | -3.720 | 115.186 | 0.387 |
| M4013 | Indonesia | -3.233 | 114.990 | 0.390 |
| M4092 | Indonesia | -0.143 | 117.241 | 0.394 |
| M4143 | Indonesia | -0.730 | 114.959 | 0.401 |
| M4198 | Indonesia | -1.992 | 103.022 | 0.401 |
| M3996 | Indonesia | -3.729 | 103.656 | 0.407 |
| M4171 | Indonesia | -0.008 | 117.251 | 0.418 |
| M3941 | Indonesia | -1.782 | 115.248 | 0.419 |
| M4082 | Indonesia | -1.055 | 114.241 | 0.421 |
| M1514 | Indonesia | 0.926  | 101.515 | 0.422 |
| M1503 | Indonesia | -2.237 | 113.908 | 0.422 |

|       |           |        |         |       |
|-------|-----------|--------|---------|-------|
| M4203 | Indonesia | -1.510 | 102.721 | 0.425 |
| M4222 | Indonesia | -0.785 | 114.946 | 0.426 |
| M4007 | Indonesia | -3.309 | 101.960 | 0.429 |
| M3280 | Indonesia | -1.795 | 103.090 | 0.436 |
| M1487 | Indonesia | 4.130  | 117.193 | 0.450 |
| M4037 | Indonesia | -3.889 | 103.581 | 0.453 |
| M4062 | Indonesia | -3.213 | 115.036 | 0.466 |
| M4071 | Indonesia | -0.320 | 117.229 | 0.474 |
| M4081 | Indonesia | -0.962 | 102.712 | 0.476 |
| M3946 | Indonesia | -0.917 | 117.181 | 0.477 |
| M4159 | Indonesia | 0.461  | 117.307 | 0.477 |
| M1499 | Indonesia | -0.498 | 117.180 | 0.481 |
| M4121 | Indonesia | -3.435 | 115.511 | 0.484 |
| M4185 | Indonesia | -1.372 | 113.543 | 0.494 |
| M4084 | Indonesia | -0.718 | 117.085 | 0.502 |
| M1485 | Indonesia | -3.759 | 102.509 | 0.507 |
| M4217 | Indonesia | -3.649 | 115.274 | 0.516 |
| M4205 | Indonesia | 0.417  | 117.351 | 0.530 |
| M3988 | Indonesia | -2.245 | 103.923 | 0.533 |
| M1419 | Indonesia | -2.598 | 115.972 | 0.539 |
| M1479 | Indonesia | -2.583 | 103.391 | 0.540 |
| M4030 | Indonesia | -0.346 | 117.203 | 0.553 |
| M4199 | Indonesia | -1.490 | 103.663 | 0.557 |
| M4059 | Indonesia | -1.867 | 103.080 | 0.560 |
| M4183 | Indonesia | -1.709 | 103.005 | 0.561 |
| M1475 | Indonesia | -3.173 | 115.268 | 0.563 |
| M1497 | Indonesia | -1.596 | 101.929 | 0.563 |
| M4158 | Indonesia | -3.715 | 115.174 | 0.571 |
| M4080 | Indonesia | -0.797 | 117.101 | 0.573 |
| M3980 | Indonesia | -3.881 | 103.673 | 0.577 |
| M4093 | Indonesia | -0.669 | 117.183 | 0.578 |
| M3242 | Indonesia | -3.016 | 104.783 | 0.584 |
| M4031 | Indonesia | -3.786 | 115.317 | 0.585 |
| M4150 | Indonesia | -3.819 | 103.752 | 0.599 |
| M4127 | Indonesia | -3.477 | 115.587 | 0.609 |
| M4189 | Indonesia | -0.187 | 117.153 | 0.612 |
| M4000 | Indonesia | -2.108 | 116.188 | 0.618 |
| M3928 | Indonesia | -0.507 | 117.334 | 0.623 |
| M4169 | Indonesia | -2.014 | 103.002 | 0.632 |
| M3913 | Indonesia | -3.227 | 115.014 | 0.635 |

|       |           |        |         |       |
|-------|-----------|--------|---------|-------|
| M4176 | Indonesia | -3.870 | 103.802 | 0.640 |
| M4061 | Indonesia | -3.228 | 115.020 | 0.643 |
| M1509 | Indonesia | -0.664 | 117.257 | 0.660 |
| M4043 | Indonesia | -1.085 | 114.926 | 0.661 |
| M4085 | Indonesia | -0.703 | 116.966 | 0.664 |
| M1506 | Indonesia | -0.503 | 117.175 | 0.673 |
| M1489 | Indonesia | -0.578 | 116.028 | 0.675 |
| M4036 | Indonesia | -0.607 | 117.249 | 0.677 |
| M4065 | Indonesia | -3.848 | 102.314 | 0.682 |
| M0694 | Indonesia | -2.021 | 115.154 | 0.682 |
| M4148 | Indonesia | -2.540 | 104.133 | 0.688 |
| M4098 | Indonesia | -0.066 | 117.198 | 0.689 |
| M3268 | Indonesia | -0.565 | 117.009 | 0.691 |
| M4179 | Indonesia | -2.084 | 102.943 | 0.696 |
| M3245 | Indonesia | -0.293 | 115.887 | 0.716 |
| M4100 | Indonesia | -0.951 | 117.016 | 0.719 |
| M3948 | Indonesia | -3.271 | 114.961 | 0.739 |
| M3947 | Indonesia | -1.808 | 102.889 | 0.754 |
| M4006 | Indonesia | -3.310 | 101.958 | 0.770 |
| M4066 | Indonesia | -0.678 | 117.140 | 0.770 |
| M3983 | Indonesia | -0.982 | 102.755 | 0.799 |
| M4054 | Indonesia | -1.029 | 115.044 | 0.812 |
| M4210 | Indonesia | 0.689  | 117.595 | 0.812 |
| M4016 | Indonesia | -3.754 | 103.617 | 0.827 |
| M3281 | Indonesia | 2.092  | 117.454 | 0.830 |
| M4211 | Indonesia | -0.710 | 117.156 | 0.841 |
| M1476 | Indonesia | -3.845 | 115.246 | 0.844 |
| M1492 | Indonesia | -4.693 | 122.876 | 0.844 |
| M4057 | Indonesia | -3.250 | 114.974 | 0.857 |
| M3945 | Indonesia | -0.428 | 117.080 | 0.867 |
| M1505 | Indonesia | -3.237 | 102.874 | 0.874 |
| M3924 | Indonesia | -0.478 | 116.108 | 0.895 |
| M4220 | Indonesia | -1.033 | 115.014 | 0.912 |
| M4204 | Indonesia | -2.382 | 103.983 | 0.927 |
| M4174 | Indonesia | 2.092  | 117.395 | 0.961 |
| M4023 | Indonesia | -3.236 | 115.030 | 0.965 |
| M4118 | Indonesia | -1.083 | 115.102 | 0.981 |
| M1477 | Indonesia | 2.904  | 116.985 | 0.985 |
| M3931 | Indonesia | 2.246  | 117.346 | 0.985 |
| M1478 | Indonesia | 2.904  | 116.985 | 0.985 |

|       |           |        |         |       |
|-------|-----------|--------|---------|-------|
| M4108 | Indonesia | -3.304 | 115.373 | 0.988 |
| M1501 | Indonesia | -0.512 | 117.314 | 0.993 |
| M4018 | Indonesia | -1.450 | 102.688 | 0.996 |
| M4141 | Indonesia | -3.813 | 103.755 | 0.996 |
| M3989 | Indonesia | 2.804  | 117.426 | 1.021 |
| M4117 | Indonesia | -0.619 | 117.218 | 1.067 |
| M3943 | Indonesia | 2.123  | 117.182 | 1.076 |
| M4076 | Indonesia | -2.345 | 102.735 | 1.086 |
| M4170 | Indonesia | -2.290 | 102.770 | 1.106 |
| M4197 | Indonesia | -2.058 | 102.926 | 1.128 |
| M4095 | Indonesia | -0.727 | 117.082 | 1.158 |
| M3922 | Indonesia | -0.726 | 117.077 | 1.188 |
| M3920 | Indonesia | -0.616 | 117.271 | 1.197 |
| M4119 | Indonesia | -3.761 | 115.336 | 1.237 |
| M1508 | Indonesia | -2.609 | 103.223 | 1.252 |
| M0698 | Indonesia | -1.996 | 115.153 | 1.273 |
| M0703 | Indonesia | -1.216 | 114.805 | 1.273 |
| M3271 | Indonesia | -3.165 | 115.103 | 1.294 |
| M1510 | Indonesia | -2.617 | 102.780 | 1.294 |
| M3921 | Indonesia | 3.083  | 116.496 | 1.346 |
| M4194 | Indonesia | -3.757 | 115.392 | 1.352 |
| M4137 | Indonesia | -3.817 | 115.288 | 1.377 |
| M1368 | Indonesia | -3.979 | 114.967 | 1.379 |
| M0655 | Indonesia | -1.120 | 114.475 | 1.407 |
| M3266 | Indonesia | -0.485 | 117.116 | 1.421 |
| M3277 | Indonesia | 3.518  | 117.849 | 1.439 |
| M3234 | Indonesia | -0.448 | 117.134 | 1.441 |
| M1504 | Indonesia | -3.237 | 115.151 | 1.477 |
| M3252 | Indonesia | -0.292 | 117.080 | 1.480 |
| M0707 | Indonesia | -0.321 | 117.118 | 1.548 |
| M0690 | Indonesia | 0.789  | 117.678 | 1.632 |
| M3263 | Indonesia | -0.293 | 115.887 | 1.674 |
| M0713 | Indonesia | -0.866 | 117.151 | 1.688 |
| M3240 | Indonesia | 4.122  | 96.203  | 1.711 |
| M3282 | Indonesia | 3.526  | 117.291 | 1.714 |
| M3238 | Indonesia | -3.366 | 101.899 | 1.764 |
| M3276 | Indonesia | -6.173 | 106.809 | 1.766 |
| M3259 | Indonesia | -1.638 | 115.213 | 1.829 |
| M0684 | Indonesia | -3.801 | 103.408 | 1.843 |
| M3918 | Indonesia | -3.805 | 115.301 | 1.870 |



|       |           |        |         |       |
|-------|-----------|--------|---------|-------|
| M4078 | Indonesia | -2.868 | 115.272 | 1.880 |
| M0706 | Indonesia | -3.738 | 115.297 | 1.898 |
| M4111 | Indonesia | -2.210 | 103.757 | 1.906 |
| M1422 | Indonesia | -2.601 | 104.122 | 1.914 |
| M1420 | Indonesia | -3.863 | 115.194 | 1.970 |
| M3250 | Indonesia | -0.424 | 117.082 | 1.970 |
| M3257 | Indonesia | -0.586 | 114.791 | 1.970 |
| M1369 | Indonesia | -3.814 | 103.810 | 2.015 |
| M3248 | Indonesia | -1.652 | 103.571 | 2.068 |
| M1494 | Indonesia | -3.751 | 103.666 | 2.068 |
| M0700 | Indonesia | 0.223  | 117.280 | 2.181 |
| M3237 | Indonesia | -3.657 | 103.806 | 2.184 |
| M3249 | Indonesia | 2.086  | 117.319 | 2.261 |
| M0696 | Indonesia | -3.435 | 116.392 | 2.279 |
| M0652 | Indonesia | -0.687 | 117.244 | 2.375 |
| M0665 | Indonesia | -1.724 | 115.191 | 2.533 |
| M4128 | Indonesia | 2.275  | 117.336 | 2.533 |
| M3272 | Indonesia | -3.754 | 103.637 | 2.544 |
| M3264 | Indonesia | -3.772 | 103.630 | 2.641 |
| M1339 | Indonesia | 0.224  | 113.551 | 2.644 |
| M0697 | Indonesia | 2.904  | 116.985 | 2.673 |
| M3243 | Indonesia | -0.547 | 116.932 | 2.780 |
| M0711 | Indonesia | -0.497 | 117.229 | 2.786 |
| M2451 | Indonesia | -0.150 | 115.901 | 2.814 |
| M1421 | Indonesia | -0.853 | 101.356 | 2.814 |
| M3261 | Indonesia | -2.355 | 115.605 | 2.822 |
| M3247 | Indonesia | -3.702 | 103.700 | 2.825 |
| M3244 | Indonesia | -2.957 | 115.152 | 2.872 |
| M3260 | Indonesia | -3.401 | 104.131 | 2.952 |
| M3267 | Indonesia | -0.487 | 117.127 | 2.997 |
| M3241 | Indonesia | -6.214 | 106.831 | 3.140 |
| M0666 | Indonesia | -0.542 | 117.191 | 3.236 |
| M3251 | Indonesia | -0.756 | 117.056 | 3.389 |
| M0715 | Indonesia | -0.322 | 117.086 | 3.518 |
| M3235 | Indonesia | -3.715 | 115.621 | 3.539 |
| M0653 | Indonesia | -0.595 | 116.976 | 3.603 |
| M3253 | Indonesia | -0.764 | 117.131 | 3.636 |
| M0664 | Indonesia | -0.371 | 114.068 | 3.686 |
| M0709 | Indonesia | -0.408 | 117.258 | 3.883 |
| M3258 | Indonesia | -1.242 | 116.879 | 3.904 |

|       |           |        |         |        |
|-------|-----------|--------|---------|--------|
| M3254 | Indonesia | -2.355 | 115.605 | 3.992  |
| M0671 | Indonesia | -0.321 | 117.085 | 4.024  |
| M4044 | Indonesia | -3.237 | 116.013 | 4.080  |
| M0714 | Indonesia | -3.767 | 115.336 | 4.080  |
| M0660 | Indonesia | -0.581 | 115.706 | 4.221  |
| M0710 | Indonesia | -0.544 | 117.024 | 4.221  |
| M0689 | Indonesia | -6.176 | 106.884 | 4.221  |
| M0693 | Indonesia | -3.826 | 115.000 | 4.221  |
| M0699 | Indonesia | -0.850 | 117.142 | 4.431  |
| M0702 | Indonesia | -3.580 | 115.595 | 4.718  |
| M0712 | Indonesia | -3.878 | 115.110 | 5.487  |
| M3255 | Indonesia | -3.607 | 116.666 | 5.608  |
| M3239 | Indonesia | -6.279 | 106.830 | 5.614  |
| M1498 | Indonesia | -0.610 | 100.777 | 5.787  |
| M0716 | Indonesia | -0.317 | 115.854 | 5.793  |
| M3246 | Indonesia | -0.408 | 115.735 | 5.952  |
| M1502 | Indonesia | -1.114 | 114.486 | 5.994  |
| M0675 | Indonesia | -0.197 | 117.133 | 6.471  |
| M1515 | Indonesia | -3.753 | 115.468 | 6.724  |
| M0668 | Indonesia | 2.881  | 116.983 | 7.035  |
| M0695 | Indonesia | 2.165  | 117.411 | 7.035  |
| M0685 | Indonesia | 3.290  | 117.609 | 7.865  |
| M0650 | Indonesia | -0.990 | 114.417 | 7.879  |
| M0659 | Indonesia | -3.257 | 116.019 | 8.301  |
| M0651 | Indonesia | -0.431 | 117.269 | 8.442  |
| M0667 | Indonesia | -3.944 | 114.855 | 8.442  |
| M0687 | Indonesia | -2.204 | 115.528 | 8.442  |
| M3262 | Indonesia | -3.714 | 115.620 | 8.687  |
| M0663 | Indonesia | -2.945 | 115.226 | 8.723  |
| M0705 | Indonesia | -2.204 | 115.528 | 9.427  |
| M0680 | Indonesia | -3.422 | 116.000 | 10.130 |
| M0683 | Indonesia | 4.202  | 96.237  | 10.939 |
| M3236 | Indonesia | -0.973 | 100.476 | 11.473 |
| M0677 | Indonesia | -3.863 | 115.187 | 11.537 |
| M3269 | Indonesia | -3.159 | 115.107 | 11.960 |
| M0654 | Indonesia | -2.889 | 115.260 | 12.100 |
| M0672 | Indonesia | 0.895  | 117.806 | 12.902 |
| M0657 | Indonesia | -3.878 | 115.110 | 12.944 |
| M0662 | Indonesia | 2.037  | 117.453 | 13.085 |
| M0674 | Indonesia | -2.252 | 111.541 | 14.070 |

|       |            |        |         |         |
|-------|------------|--------|---------|---------|
| M0679 | Indonesia  | 2.219  | 117.605 | 14.070  |
| M0670 | Indonesia  | 1.143  | 117.874 | 14.084  |
| M0682 | Indonesia  | -0.535 | 117.033 | 15.477  |
| M0673 | Indonesia  | 0.146  | 117.292 | 17.503  |
| M0661 | Indonesia  | -3.700 | 115.560 | 36.160  |
| M0669 | Indonesia  | 0.551  | 116.126 | 43.476  |
| M0704 | Indonesia  | -2.204 | 115.528 | 44.743  |
| M0688 | Indonesia  | -1.891 | 115.872 | 50.230  |
| M0678 | Indonesia  | 0.824  | 117.599 | 79.355  |
| M0691 | Indonesia  | -3.740 | 103.768 | 207.124 |
| M1768 | Iran       | 36.020 | 60.813  | 0.020   |
| M1767 | Iran       | 36.394 | 54.371  | 0.196   |
| M1466 | Iran       | 37.028 | 55.294  | 0.706   |
| M3283 | Iran       | 33.161 | 56.203  | 2.814   |
| M1431 | Iran       | 36.403 | 54.428  | 3.912   |
| M1465 | Japan      | 42.957 | 144.426 | 5.802   |
| M2352 | Kazakhstan | 47.406 | 70.430  | 0.563   |
| M4230 | Kazakhstan | 49.749 | 73.670  | 0.704   |
| M0718 | Kazakhstan | 50.268 | 73.391  | 1.407   |
| M4231 | Kazakhstan | 49.017 | 68.615  | 2.355   |
| M0720 | Kazakhstan | 51.259 | 75.695  | 5.347   |
| M1435 | Kazakhstan | 49.686 | 72.759  | 5.712   |
| M4232 | Kazakhstan | 49.011 | 68.535  | 8.723   |
| M0722 | Kazakhstan | 49.017 | 68.615  | 9.286   |
| M1259 | Kazakhstan | 50.861 | 73.656  | 12.804  |
| M1439 | Kazakhstan | 49.750 | 72.563  | 14.539  |
| M1437 | Kazakhstan | 49.806 | 72.966  | 14.740  |
| M1769 | Kazakhstan | 49.793 | 72.581  | 17.541  |
| M1434 | Kazakhstan | 49.860 | 73.114  | 22.110  |
| M1436 | Kazakhstan | 49.773 | 72.895  | 33.165  |
| M1438 | Kazakhstan | 49.726 | 72.522  | 37.649  |
| M4229 | Kazakhstan | 50.027 | 78.729  | 44.461  |
| M1440 | Kazakhstan | 49.764 | 72.618  | 49.212  |
| M0721 | Kazakhstan | 51.716 | 75.370  | 71.020  |
| M0723 | Kazakhstan | 51.687 | 75.452  | 100.456 |
| M0717 | Kazakhstan | 51.655 | 75.434  | 237.207 |
| M0724 | Kosovo     | 42.659 | 21.012  | 11.369  |
| M1772 | Kyrgyzstan | 41.680 | 74.449  | 0.028   |
| M1370 | Kyrgyzstan | 40.227 | 72.277  | 0.704   |
| M1413 | Kyrgyzstan | 41.724 | 74.793  | 1.688   |

|       |             |         |          |        |
|-------|-------------|---------|----------|--------|
| M0725 | Laos        | 19.710  | 101.298  | 20.120 |
| M1546 | Malawi      | -10.015 | 33.812   | 1.565  |
| M1432 | Malawi      | -10.715 | 34.154   | 3.532  |
| M1375 | Malaysia    | 2.741   | 112.473  | 10.461 |
| M3689 | Mexico      | 27.739  | -101.383 | 0.028  |
| M2629 | Mexico      | 27.628  | -101.455 | 0.119  |
| M2358 | Mexico      | 27.572  | -101.340 | 1.829  |
| M1260 | Mexico      | 27.620  | -101.246 | 18.044 |
| M2475 | Mexico      | 28.498  | -100.684 | 42.197 |
| M1516 | Mongolia    | 45.994  | 106.128  | 0.070  |
| M3286 | Mongolia    | 49.849  | 90.903   | 0.070  |
| M1775 | Mongolia    | 46.957  | 114.831  | 0.169  |
| M1774 | Mongolia    | 49.358  | 97.830   | 0.281  |
| M2517 | Mongolia    | 50.318  | 104.974  | 0.507  |
| M0728 | Mongolia    | 43.598  | 105.223  | 0.704  |
| M1548 | Mongolia    | 46.120  | 108.992  | 0.704  |
| M1547 | Mongolia    | 48.127  | 114.538  | 0.844  |
| M1773 | Mongolia    | 49.228  | 106.422  | 1.126  |
| M1387 | Mongolia    | 49.850  | 90.898   | 1.407  |
| M1423 | Mongolia    | 43.110  | 102.331  | 2.111  |
| M1414 | Mongolia    | 46.040  | 107.861  | 2.814  |
| M0731 | Mongolia    | 46.807  | 93.310   | 4.221  |
| M0732 | Mongolia    | 43.002  | 101.261  | 4.221  |
| M0737 | Mongolia    | 43.667  | 105.518  | 5.347  |
| M0727 | Mongolia    | 47.751  | 108.325  | 6.120  |
| M0736 | Mongolia    | 43.625  | 105.474  | 7.007  |
| M0735 | Mongolia    | 43.002  | 101.261  | 8.540  |
| M1362 | Montenegro  | 43.339  | 19.364   | 2.111  |
| M0739 | Mozambique  | -15.914 | 33.013   | 2.026  |
| M0738 | Mozambique  | -16.167 | 33.661   | 3.855  |
| M0740 | Mozambique  | -16.168 | 33.789   | 16.603 |
| M3289 | Myanmar     | 22.712  | 97.836   | 0.017  |
| M3290 | Myanmar     | 22.660  | 97.288   | 0.084  |
| M1467 | Myanmar     | 13.833  | 98.688   | 0.253  |
| M1468 | Myanmar     | 20.421  | 96.712   | 1.126  |
| M1549 | Nepal       | 28.039  | 85.214   | 0.048  |
| M1447 | New Zealand | -41.879 | 171.847  | 0.010  |
| M3296 | New Zealand | -46.148 | 168.755  | 0.034  |
| M3298 | New Zealand | -42.098 | 171.891  | 0.062  |
| M3300 | New Zealand | -42.342 | 171.303  | 0.084  |

|       |                 |         |         |         |
|-------|-----------------|---------|---------|---------|
| M1446 | New Zealand     | -42.164 | 171.957 | 0.098   |
| M3299 | New Zealand     | -42.222 | 171.605 | 0.210   |
| M1445 | New Zealand     | -42.037 | 171.799 | 0.288   |
| M3297 | New Zealand     | -45.962 | 168.030 | 0.303   |
| M1444 | New Zealand     | -37.281 | 175.201 | 0.393   |
| M1443 | New Zealand     | -37.594 | 175.074 | 0.650   |
| M1301 | New Zealand     | -41.669 | 171.872 | 1.386   |
| M1550 | Niger           | 17.288  | 7.838   | 0.281   |
| M1777 | Nigeria         | 6.401   | 7.451   | 0.015   |
| M1551 | Nigeria         | 7.422   | 7.781   | 0.225   |
| M4240 | North Korea     | 39.851  | 126.095 | 0.373   |
| M2463 | North Korea     | 39.611  | 126.275 | 0.933   |
| M2787 | North Korea     | 39.472  | 125.396 | 1.134   |
| M2375 | North Korea     | 39.776  | 125.959 | 5.907   |
| M2682 | North Korea     | 39.851  | 126.095 | 7.773   |
| M2606 | North Korea     | 40.268  | 125.180 | 9.327   |
| M2627 | North Korea     | 39.492  | 125.669 | 9.327   |
| M0745 | North Korea     | 39.472  | 125.396 | 16.709  |
| M0746 | North Korea     | 42.861  | 130.200 | 21.042  |
| M2521 | North Korea     | 40.490  | 129.069 | 31.091  |
| M2421 | North Korea     | 39.723  | 125.886 | 43.527  |
| M4239 | North Korea     | 39.384  | 126.925 | 77.727  |
| M4238 | North Korea     | 39.039  | 126.240 | 93.273  |
| M4237 | North Korea     | 39.763  | 126.290 | 124.364 |
| M4241 | North Macedonia | 41.582  | 21.000  | 0.267   |
| M0747 | North Macedonia | 40.967  | 21.539  | 2.716   |
| M0748 | North Macedonia | 41.047  | 21.527  | 3.940   |
| M1455 | Norway          | 78.226  | 15.627  | 1.590   |
| M0750 | Pakistan        | 24.776  | 70.398  | 3.391   |
| M1552 | Peru            | -10.698 | -76.727 | 1.273   |
| M3305 | Philippines     | 7.665   | 122.994 | 0.010   |
| M0751 | Philippines     | 12.116  | 121.369 | 25.270  |
| M1557 | Poland          | 50.340  | 18.824  | 0.127   |
| M1554 | Poland          | 52.306  | 18.231  | 0.244   |
| M3308 | Poland          | 52.378  | 15.369  | 0.579   |
| M0755 | Poland          | 50.093  | 19.332  | 1.966   |
| M1556 | Poland          | 50.384  | 18.883  | 2.260   |
| M3307 | Poland          | 52.303  | 18.236  | 3.467   |
| M0757 | Poland          | 52.417  | 18.163  | 4.995   |
| M3306 | Poland          | 49.967  | 18.565  | 9.869   |

|       |         |        |         |         |
|-------|---------|--------|---------|---------|
| M1470 | Poland  | 49.939 | 19.014  | 12.292  |
| M1553 | Poland  | 49.986 | 19.156  | 16.995  |
| M0761 | Poland  | 50.268 | 18.836  | 23.721  |
| M0764 | Poland  | 50.929 | 14.926  | 25.027  |
| M1471 | Poland  | 50.275 | 18.717  | 26.761  |
| M0758 | Poland  | 50.225 | 19.049  | 28.936  |
| M1469 | Poland  | 50.380 | 18.960  | 31.300  |
| M1288 | Poland  | 50.176 | 18.761  | 34.169  |
| M1473 | Poland  | 50.094 | 19.332  | 37.743  |
| M1287 | Poland  | 50.242 | 18.988  | 37.828  |
| M1474 | Poland  | 50.194 | 19.282  | 45.817  |
| M1289 | Poland  | 49.966 | 18.689  | 59.424  |
| M1472 | Poland  | 50.181 | 19.094  | 60.539  |
| M1261 | Poland  | 50.222 | 18.672  | 104.665 |
| M0759 | Poland  | 50.080 | 19.161  | 110.706 |
| M0753 | Poland  | 51.242 | 19.275  | 115.827 |
| M0760 | Poland  | 50.046 | 18.588  | 143.615 |
| M0754 | Poland  | 51.324 | 23.005  | 287.447 |
| M3313 | Romania | 44.841 | 23.274  | 2.251   |
| M3314 | Romania | 44.888 | 23.122  | 2.955   |
| M3311 | Romania | 44.846 | 23.056  | 3.518   |
| M3312 | Romania | 44.840 | 23.970  | 3.658   |
| M3310 | Romania | 44.863 | 23.050  | 3.799   |
| M3316 | Romania | 44.851 | 23.002  | 4.826   |
| M3318 | Romania | 44.926 | 23.096  | 5.009   |
| M3315 | Romania | 44.888 | 23.183  | 5.107   |
| M1559 | Russia  | 56.692 | 96.145  | 0.084   |
| M4287 | Russia  | 50.650 | 112.840 | 0.169   |
| M4254 | Russia  | 56.379 | 95.599  | 0.179   |
| M1570 | Russia  | 69.299 | 87.743  | 0.211   |
| M4293 | Russia  | 65.752 | 149.767 | 0.225   |
| M1564 | Russia  | 51.319 | 91.839  | 0.267   |
| M4276 | Russia  | 59.160 | 160.064 | 0.267   |
| M1567 | Russia  | 62.197 | 135.875 | 0.281   |
| M1569 | Russia  | 62.351 | 129.953 | 0.281   |
| M4265 | Russia  | 56.847 | 124.775 | 0.281   |
| M3684 | Russia  | 64.736 | 177.683 | 0.358   |
| M2340 | Russia  | 67.518 | 64.404  | 0.394   |
| M4271 | Russia  | 54.026 | 86.563  | 0.422   |
| M0799 | Russia  | 51.640 | 94.639  | 0.563   |

|       |        |        |         |       |
|-------|--------|--------|---------|-------|
| M4291 | Russia | 51.317 | 106.555 | 0.563 |
| M4260 | Russia | 50.092 | 119.112 | 0.704 |
| M2341 | Russia | 54.032 | 86.591  | 0.704 |
| M2876 | Russia | 44.199 | 131.798 | 0.704 |
| M1372 | Russia | 53.687 | 91.147  | 0.915 |
| M4284 | Russia | 53.437 | 87.267  | 0.985 |
| M1096 | Russia | 53.686 | 87.998  | 0.985 |
| M2506 | Russia | 58.214 | 102.913 | 0.985 |
| M0844 | Russia | 54.340 | 86.082  | 1.069 |
| M1348 | Russia | 54.032 | 86.644  | 1.126 |
| M0786 | Russia | 54.365 | 86.898  | 1.266 |
| M4273 | Russia | 53.782 | 88.183  | 1.266 |
| M0846 | Russia | 53.621 | 87.800  | 1.266 |
| M1347 | Russia | 53.606 | 91.441  | 1.323 |
| M4283 | Russia | 53.953 | 86.647  | 1.337 |
| M4244 | Russia | 49.594 | 142.227 | 1.407 |
| M0859 | Russia | 53.996 | 86.662  | 1.407 |
| M1568 | Russia | 54.539 | 86.387  | 1.501 |
| M4290 | Russia | 54.465 | 86.768  | 1.548 |
| M0769 | Russia | 62.967 | 178.766 | 1.590 |
| M1293 | Russia | 55.222 | 94.531  | 1.829 |
| M1371 | Russia | 49.814 | 129.449 | 1.829 |
| M1381 | Russia | 53.592 | 86.900  | 1.829 |
| M4258 | Russia | 53.435 | 87.239  | 1.970 |
| M0834 | Russia | 54.048 | 86.622  | 2.058 |
| M4245 | Russia | 53.676 | 86.946  | 2.111 |
| M2343 | Russia | 54.006 | 86.689  | 2.111 |
| M1566 | Russia | 51.632 | 113.031 | 2.111 |
| M4278 | Russia | 53.729 | 88.085  | 2.140 |
| M2342 | Russia | 53.941 | 86.633  | 2.392 |
| M1290 | Russia | 51.088 | 132.991 | 2.814 |
| M4252 | Russia | 46.471 | 141.878 | 2.814 |
| M0798 | Russia | 56.944 | 124.751 | 2.814 |
| M1517 | Russia | 50.609 | 107.039 | 2.814 |
| M1292 | Russia | 55.988 | 90.276  | 2.859 |
| M0870 | Russia | 54.187 | 87.039  | 2.948 |
| M0804 | Russia | 54.358 | 86.747  | 2.955 |
| M0808 | Russia | 53.279 | 91.225  | 2.955 |
| M4285 | Russia | 54.031 | 86.643  | 3.045 |
| M1270 | Russia | 54.362 | 86.850  | 3.145 |

|       |        |        |         |       |
|-------|--------|--------|---------|-------|
| M1360 | Russia | 54.473 | 100.702 | 3.236 |
| M0795 | Russia | 50.316 | 128.447 | 3.518 |
| M0803 | Russia | 54.340 | 86.818  | 3.729 |
| M1364 | Russia | 55.727 | 95.314  | 3.771 |
| M0813 | Russia | 53.634 | 87.972  | 3.940 |
| M0773 | Russia | 55.725 | 86.018  | 4.080 |
| M1519 | Russia | 50.175 | 118.005 | 4.080 |
| M1563 | Russia | 55.536 | 91.570  | 4.221 |
| M4249 | Russia | 56.730 | 124.958 | 4.221 |
| M0800 | Russia | 54.223 | 87.030  | 4.221 |
| M4262 | Russia | 53.542 | 87.631  | 4.221 |
| M0833 | Russia | 55.721 | 86.172  | 4.233 |
| M0869 | Russia | 53.309 | 91.381  | 4.380 |
| M0838 | Russia | 53.833 | 88.186  | 4.502 |
| M0830 | Russia | 55.628 | 94.704  | 4.559 |
| M1363 | Russia | 44.065 | 132.078 | 4.728 |
| M4264 | Russia | 54.234 | 87.088  | 4.925 |
| M4267 | Russia | 46.471 | 134.213 | 4.925 |
| M0853 | Russia | 54.161 | 87.097  | 5.149 |
| M1267 | Russia | 53.414 | 87.414  | 5.216 |
| M1424 | Russia | 53.615 | 87.872  | 5.417 |
| M0822 | Russia | 56.705 | 124.591 | 5.628 |
| M0835 | Russia | 51.201 | 133.005 | 5.628 |
| M0850 | Russia | 53.706 | 91.088  | 5.769 |
| M1276 | Russia | 54.438 | 100.189 | 5.909 |
| M0805 | Russia | 55.553 | 86.098  | 6.025 |
| M0807 | Russia | 50.565 | 116.402 | 6.296 |
| M0771 | Russia | 53.399 | 91.096  | 6.332 |
| M0866 | Russia | 54.395 | 86.809  | 6.402 |
| M0777 | Russia | 55.678 | 89.176  | 6.472 |
| M1262 | Russia | 53.264 | 102.943 | 6.472 |
| M4243 | Russia | 55.601 | 86.245  | 6.512 |
| M1271 | Russia | 53.656 | 87.928  | 6.613 |
| M0819 | Russia | 53.390 | 91.165  | 6.754 |
| M0823 | Russia | 53.833 | 88.134  | 6.865 |
| M0781 | Russia | 54.325 | 86.867  | 7.035 |
| M0832 | Russia | 54.275 | 86.882  | 7.228 |
| M0831 | Russia | 54.426 | 86.806  | 7.316 |
| M0825 | Russia | 54.228 | 87.264  | 7.739 |
| M0871 | Russia | 54.647 | 83.627  | 7.996 |



|       |        |        |         |        |
|-------|--------|--------|---------|--------|
| M0810 | Russia | 53.571 | 87.668  | 8.094  |
| M0821 | Russia | 54.593 | 86.404  | 8.383  |
| M0787 | Russia | 55.600 | 86.093  | 8.566  |
| M0779 | Russia | 53.911 | 87.329  | 8.581  |
| M0778 | Russia | 53.745 | 86.786  | 8.583  |
| M4253 | Russia | 54.505 | 86.430  | 9.552  |
| M2344 | Russia | 53.705 | 88.071  | 9.715  |
| M0811 | Russia | 54.679 | 83.625  | 10.271 |
| M0812 | Russia | 54.168 | 86.473  | 10.553 |
| M0790 | Russia | 53.757 | 91.066  | 13.507 |
| M0837 | Russia | 53.729 | 88.085  | 13.597 |
| M3322 | Russia | 53.621 | 87.800  | 13.730 |
| M0849 | Russia | 48.933 | 142.186 | 14.492 |
| M3320 | Russia | 54.344 | 86.830  | 14.647 |
| M0854 | Russia | 54.177 | 87.191  | 15.055 |
| M0820 | Russia | 51.392 | 94.111  | 15.653 |
| M0783 | Russia | 51.232 | 108.423 | 16.884 |
| M1560 | Russia | 53.877 | 87.312  | 17.163 |
| M1561 | Russia | 55.802 | 86.118  | 17.163 |
| M0856 | Russia | 54.532 | 86.167  | 18.879 |
| M4292 | Russia | 54.592 | 86.249  | 20.595 |
| M0794 | Russia | 56.192 | 130.636 | 20.683 |
| M1291 | Russia | 54.116 | 87.043  | 22.064 |
| M1272 | Russia | 48.037 | 40.190  | 23.529 |
| M0840 | Russia | 54.641 | 86.277  | 25.473 |
| M0780 | Russia | 55.841 | 94.931  | 26.817 |
| M4247 | Russia | 48.089 | 40.381  | 27.155 |
| M1518 | Russia | 53.922 | 87.324  | 37.758 |
| M0828 | Russia | 53.646 | 87.416  | 38.371 |
| M4279 | Russia | 48.071 | 40.441  | 38.471 |
| M0878 | Russia | 53.917 | 87.509  | 39.188 |
| M0877 | Russia | 54.122 | 87.355  | 39.474 |
| M2339 | Russia | 67.550 | 63.807  | 40.502 |
| M1342 | Russia | 53.862 | 87.332  | 41.004 |
| M1379 | Russia | 54.125 | 87.151  | 41.191 |
| M0867 | Russia | 67.595 | 63.616  | 43.305 |
| M1565 | Russia | 54.324 | 86.340  | 44.212 |
| M0864 | Russia | 54.124 | 87.296  | 48.742 |
| M1380 | Russia | 54.641 | 86.202  | 52.930 |
| M2338 | Russia | 67.485 | 63.766  | 55.359 |

|       |              |         |         |         |
|-------|--------------|---------|---------|---------|
| M1343 | Russia       | 54.599  | 86.059  | 57.289  |
| M0824 | Russia       | 54.571  | 86.384  | 58.353  |
| M1097 | Russia       | 47.857  | 40.820  | 60.768  |
| M4250 | Russia       | 56.759  | 124.924 | 68.651  |
| M0767 | Russia       | 53.414  | 87.315  | 76.007  |
| M0809 | Russia       | 54.652  | 86.153  | 77.754  |
| M1265 | Russia       | 56.944  | 124.751 | 102.976 |
| M0847 | Russia       | 54.546  | 86.286  | 102.976 |
| M0880 | Russia       | 54.152  | 87.123  | 102.976 |
| M0836 | Russia       | 53.784  | 88.082  | 103.247 |
| M3324 | Russia       | 51.171  | 133.028 | 104.252 |
| M1520 | Russia       | 54.095  | 87.560  | 106.409 |
| M0868 | Russia       | 67.525  | 64.021  | 129.414 |
| M0876 | Russia       | 54.221  | 86.958  | 137.302 |
| M0772 | Russia       | 54.299  | 86.146  | 147.597 |
| M4297 | Serbia       | 44.202  | 21.572  | 0.215   |
| M4298 | Serbia       | 43.857  | 22.166  | 0.272   |
| M3329 | Serbia       | 43.635  | 22.007  | 0.522   |
| M4301 | Serbia       | 43.271  | 20.129  | 0.554   |
| M4300 | Serbia       | 44.041  | 21.580  | 1.102   |
| M4296 | Serbia       | 43.396  | 20.638  | 1.219   |
| M3326 | Serbia       | 44.418  | 20.339  | 5.065   |
| M3327 | Serbia       | 44.407  | 20.364  | 7.316   |
| M3325 | Serbia       | 44.407  | 20.364  | 8.161   |
| M0882 | Serbia       | 44.722  | 21.246  | 13.226  |
| M3330 | Serbia       | 44.474  | 20.223  | 16.743  |
| M1522 | Slovakia     | 48.716  | 18.556  | 5.445   |
| M0884 | Slovenia     | 46.369  | 15.078  | 17.582  |
| M2501 | South Africa | -27.960 | 30.181  | 0.135   |
| M4308 | South Africa | -27.594 | 30.214  | 0.507   |
| M2335 | South Africa | -27.870 | 30.126  | 0.718   |
| M3342 | South Africa | -26.099 | 29.043  | 0.876   |
| M1572 | South Africa | -27.903 | 29.924  | 1.052   |
| M0951 | South Africa | -25.705 | 29.739  | 1.266   |
| M3334 | South Africa | -25.907 | 29.093  | 1.315   |
| M4319 | South Africa | -25.847 | 29.470  | 1.407   |
| M1313 | South Africa | -26.012 | 28.960  | 1.407   |
| M0907 | South Africa | -26.040 | 28.968  | 1.548   |
| M0906 | South Africa | -26.191 | 28.668  | 1.618   |
| M3339 | South Africa | -28.311 | 32.066  | 1.688   |

|       |              |         |        |        |
|-------|--------------|---------|--------|--------|
| M1297 | South Africa | -26.092 | 28.904 | 1.857  |
| M1571 | South Africa | -26.142 | 29.480 | 1.906  |
| M2328 | South Africa | -26.172 | 29.453 | 1.942  |
| M1334 | South Africa | -26.113 | 28.818 | 2.026  |
| M1352 | South Africa | -25.832 | 29.694 | 2.111  |
| M1299 | South Africa | -26.194 | 28.863 | 2.111  |
| M1356 | South Africa | -25.836 | 29.455 | 2.279  |
| M1353 | South Africa | -26.238 | 29.528 | 2.520  |
| M1354 | South Africa | -26.942 | 27.731 | 2.629  |
| M0921 | South Africa | -26.171 | 28.854 | 2.814  |
| M3338 | South Africa | -25.667 | 29.653 | 3.095  |
| M2331 | South Africa | -26.107 | 30.216 | 3.286  |
| M4322 | South Africa | -25.946 | 29.627 | 3.377  |
| M0886 | South Africa | -25.834 | 29.988 | 3.799  |
| M1351 | South Africa | -25.812 | 29.403 | 3.799  |
| M1305 | South Africa | -25.774 | 28.795 | 3.940  |
| M1279 | South Africa | -25.851 | 29.867 | 3.940  |
| M0919 | South Africa | -26.226 | 28.693 | 4.221  |
| M1349 | South Africa | -25.526 | 28.777 | 4.362  |
| M1355 | South Africa | -26.261 | 28.828 | 4.382  |
| M0909 | South Africa | -25.926 | 29.156 | 4.925  |
| M0926 | South Africa | -25.695 | 30.014 | 5.065  |
| M0915 | South Africa | -26.173 | 28.728 | 5.136  |
| M2325 | South Africa | -26.666 | 30.102 | 5.258  |
| M1335 | South Africa | -27.141 | 30.554 | 5.691  |
| M0930 | South Africa | -27.023 | 30.417 | 5.949  |
| M0904 | South Africa | -26.435 | 29.209 | 6.332  |
| M1298 | South Africa | -25.810 | 29.385 | 6.573  |
| M2857 | South Africa | -28.091 | 30.238 | 7.117  |
| M0944 | South Africa | -26.168 | 29.863 | 7.157  |
| M0917 | South Africa | -25.794 | 29.736 | 7.316  |
| M4312 | South Africa | -27.022 | 30.414 | 7.404  |
| M0905 | South Africa | -26.026 | 28.878 | 8.442  |
| M0942 | South Africa | -26.174 | 28.843 | 8.626  |
| M0945 | South Africa | -26.324 | 29.261 | 8.924  |
| M0899 | South Africa | -25.961 | 29.185 | 8.983  |
| M0897 | South Africa | -26.100 | 29.073 | 9.005  |
| M0896 | South Africa | -26.103 | 29.407 | 9.640  |
| M4323 | South Africa | -28.222 | 31.674 | 9.788  |
| M0939 | South Africa | -26.038 | 29.161 | 11.962 |

|       |              |         |         |        |
|-------|--------------|---------|---------|--------|
| M0908 | South Africa | -26.124 | 29.003  | 12.050 |
| M0891 | South Africa | -26.563 | 29.200  | 12.488 |
| M4315 | South Africa | -25.778 | 31.800  | 12.585 |
| M0922 | South Africa | -26.136 | 29.317  | 12.791 |
| M0920 | South Africa | -26.263 | 29.127  | 12.926 |
| M0910 | South Africa | -25.991 | 29.062  | 14.241 |
| M0948 | South Africa | -25.899 | 29.461  | 15.899 |
| M0903 | South Africa | -26.109 | 29.231  | 16.870 |
| M0924 | South Africa | -25.905 | 28.973  | 16.884 |
| M0936 | South Africa | -26.410 | 29.201  | 20.375 |
| M0925 | South Africa | -26.720 | 27.960  | 26.030 |
| M0900 | South Africa | -23.657 | 27.567  | 37.848 |
| M0923 | South Africa | -26.740 | 29.309  | 39.132 |
| M0895 | South Africa | -26.224 | 29.298  | 53.684 |
| M0914 | South Africa | -26.226 | 29.136  | 54.270 |
| M0902 | South Africa | -26.581 | 29.145  | 68.861 |
| M0931 | South Africa | -26.468 | 29.054  | 82.195 |
| M0949 | South Africa | -26.044 | 29.041  | 95.568 |
| M0940 | South Africa | -26.463 | 29.286  | 97.615 |
| M1458 | South Korea  | 37.205  | 129.084 | 4.042  |
| M1457 | South Korea  | 35.033  | 127.067 | 7.648  |
| M1456 | South Korea  | 37.227  | 129.044 | 8.395  |
| M1574 | South Korea  | 37.205  | 129.084 | 17.100 |
| M3343 | Spain        | 43.252  | -5.818  | 3.532  |
| M1630 | Tajikistan   | 38.568  | 68.996  | 0.056  |
| M4324 | Tajikistan   | 39.028  | 68.879  | 0.281  |
| M1631 | Tajikistan   | 39.410  | 68.529  | 0.422  |
| M1633 | Tajikistan   | 40.055  | 70.560  | 0.456  |
| M1632 | Tajikistan   | 39.185  | 68.585  | 0.563  |
| M1629 | Tajikistan   | 39.185  | 68.585  | 14.306 |
| M0952 | Tanzania     | -10.646 | 35.642  | 4.890  |
| M0953 | Thailand     | 18.315  | 99.720  | 94.008 |
| M1578 | Türkiye      | 40.866  | 35.656  | 0.070  |
| M1587 | Türkiye      | 40.843  | 35.667  | 0.284  |
| M1586 | Türkiye      | 41.075  | 26.838  | 0.352  |
| M1590 | Türkiye      | 40.856  | 34.759  | 0.422  |
| M1591 | Türkiye      | 40.856  | 34.759  | 0.422  |
| M1581 | Türkiye      | 38.060  | 28.629  | 0.454  |
| M1575 | Türkiye      | 40.876  | 35.621  | 0.454  |
| M1582 | Türkiye      | 39.572  | 32.834  | 0.535  |

|       |         |        |        |        |
|-------|---------|--------|--------|--------|
| M1577 | Türkiye | 39.786 | 35.136 | 0.549  |
| M1585 | Türkiye | 41.100 | 26.748 | 0.563  |
| M1580 | Türkiye | 40.932 | 26.806 | 0.567  |
| M0965 | Türkiye | 40.871 | 35.636 | 0.687  |
| M0958 | Türkiye | 41.722 | 32.349 | 0.943  |
| M1588 | Türkiye | 41.340 | 31.511 | 1.413  |
| M0976 | Türkiye | 39.635 | 29.455 | 1.548  |
| M1589 | Türkiye | 39.866 | 28.564 | 1.702  |
| M0971 | Türkiye | 37.571 | 28.111 | 1.702  |
| M0961 | Türkiye | 39.922 | 28.968 | 2.251  |
| M1415 | Türkiye | 39.903 | 29.177 | 2.251  |
| M0970 | Türkiye | 41.432 | 31.758 | 2.356  |
| M1584 | Türkiye | 38.372 | 31.846 | 2.382  |
| M0959 | Türkiye | 40.246 | 30.797 | 2.533  |
| M0977 | Türkiye | 41.439 | 31.847 | 2.826  |
| M1579 | Türkiye | 41.002 | 26.862 | 2.836  |
| M0962 | Türkiye | 41.439 | 31.847 | 3.461  |
| M1583 | Türkiye | 41.483 | 31.868 | 4.240  |
| M0974 | Türkiye | 37.323 | 28.092 | 7.457  |
| M0975 | Türkiye | 38.186 | 36.270 | 7.739  |
| M0972 | Türkiye | 39.574 | 29.832 | 8.442  |
| M1282 | Türkiye | 37.163 | 27.889 | 9.615  |
| M0973 | Türkiye | 39.078 | 37.296 | 11.256 |
| M1281 | Türkiye | 37.163 | 27.889 | 12.362 |
| M0966 | Türkiye | 39.629 | 29.460 | 33.247 |
| M0955 | Türkiye | 38.341 | 37.083 | 38.461 |
| M0954 | Türkiye | 39.083 | 27.540 | 39.010 |
| M3345 | Ukraine | 50.782 | 24.122 | 1.089  |
| M3347 | Ukraine | 50.730 | 24.124 | 2.206  |
| M3348 | Ukraine | 48.376 | 36.375 | 2.373  |
| M2836 | Ukraine | 48.740 | 38.502 | 8.432  |
| M1404 | Ukraine | 48.375 | 36.373 | 13.175 |
| M1408 | Ukraine | 48.474 | 36.117 | 26.350 |
| M2336 | Ukraine | 48.062 | 39.807 | 31.530 |
| M1406 | Ukraine | 48.558 | 35.987 | 31.619 |
| M1409 | Ukraine | 48.467 | 36.232 | 47.429 |
| M1407 | Ukraine | 48.362 | 36.426 | 52.699 |
| M1411 | Ukraine | 48.535 | 36.093 | 63.239 |
| M1283 | Ukraine | 48.595 | 35.956 | 81.684 |
| M1383 | Ukraine | 48.015 | 39.724 | 98.860 |

|       |                |         |         |        |
|-------|----------------|---------|---------|--------|
| M1594 | United Kingdom | 51.753  | -3.344  | 0.141  |
| M1593 | United Kingdom | 51.800  | -3.838  | 0.507  |
| M1592 | United Kingdom | 51.741  | -3.644  | 8.324  |
| M2640 | Uzbekistan     | 41.061  | 70.132  | 0.704  |
| M1628 | Uzbekistan     | 38.198  | 67.212  | 0.883  |
| M1085 | Uzbekistan     | 38.463  | 67.975  | 4.592  |
| M1083 | Uzbekistan     | 41.036  | 70.180  | 5.909  |
| M1634 | Venezuela      | 11.040  | -72.268 | 11.256 |
| M1389 | Vietnam        | 20.969  | 107.139 | 0.739  |
| M3675 | Vietnam        | 21.580  | 104.770 | 2.065  |
| M3678 | Vietnam        | 21.049  | 107.198 | 2.082  |
| M1382 | Vietnam        | 20.994  | 107.151 | 2.111  |
| M1089 | Vietnam        | 21.020  | 107.290 | 2.392  |
| M1390 | Vietnam        | 21.035  | 107.226 | 2.392  |
| M1388 | Vietnam        | 21.027  | 107.242 | 2.549  |
| M3680 | Vietnam        | 20.996  | 107.204 | 2.608  |
| M3677 | Vietnam        | 21.053  | 107.233 | 2.700  |
| M1087 | Vietnam        | 21.020  | 107.320 | 2.814  |
| M1426 | Vietnam        | 20.986  | 107.113 | 3.236  |
| M3676 | Vietnam        | 21.078  | 106.712 | 3.755  |
| M1088 | Vietnam        | 21.038  | 107.308 | 3.940  |
| M1442 | Vietnam        | 21.060  | 106.760 | 5.844  |
| M4326 | Vietnam        | 10.496  | 105.035 | 5.952  |
| M3679 | Vietnam        | 20.972  | 107.045 | 6.520  |
| M1092 | Vietnam        | 21.580  | 104.770 | 18.519 |
| M1093 | Vietnam        | 21.070  | 106.620 | 18.519 |
| M1394 | Vietnam        | 21.138  | 106.753 | 23.450 |
| M1091 | Vietnam        | 15.720  | 108.350 | 27.328 |
| M1094 | Vietnam        | 21.250  | 107.330 | 28.682 |
| M1090 | Vietnam        | 21.040  | 107.251 | 35.803 |
| M1285 | Vietnam        | 21.133  | 106.808 | 36.460 |
| M4327 | Vietnam        | 20.839  | 105.978 | 42.363 |
| M1318 | Zambia         | -17.347 | 27.189  | 0.943  |
| M1454 | Zambia         | -17.155 | 27.368  | 0.978  |
| M3683 | Zimbabwe       | -18.425 | 26.530  | 0.141  |
| M1779 | Zimbabwe       | -18.299 | 26.500  | 0.844  |
| M1314 | Zimbabwe       | -18.398 | 26.475  | 1.674  |
| M1307 | Zimbabwe       | -18.444 | 26.533  | 6.826  |
| M2323 | Zimbabwe       | -21.040 | 31.673  | 20.595 |

---
